# Supplementary material for: Partitioning the impact of environment and spatial structure on alpha and beta components of taxonomic, functional, and phylogenetic diversity in European ants
Source: PubMed Central journal article supplement (PMC4592154; doi:10.7717/peerj.1241), 2015-09-29

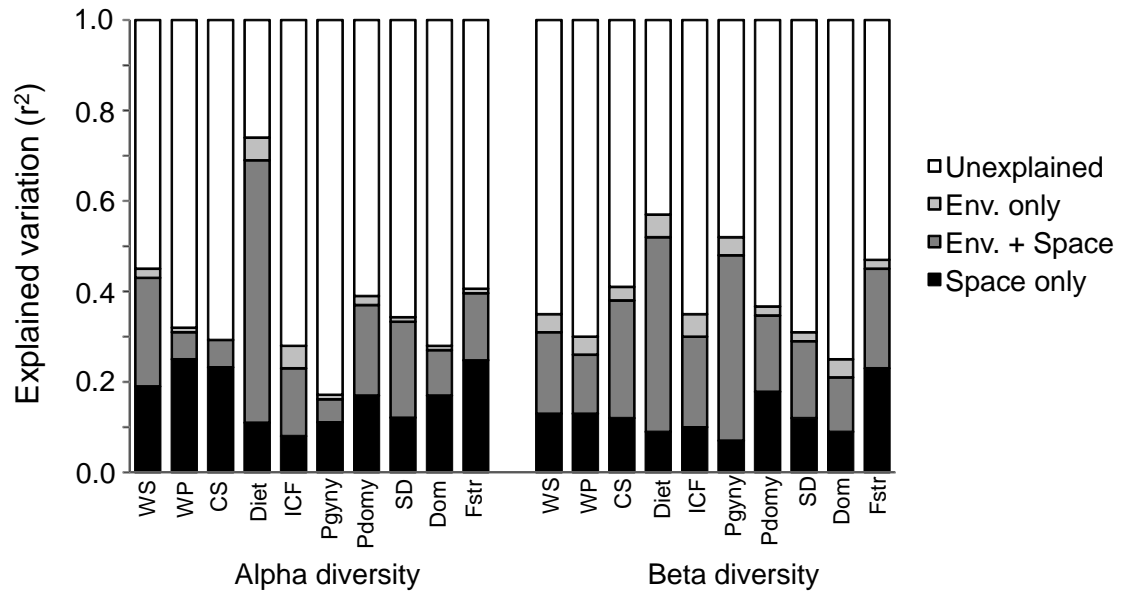

Supplement: peerj-03-1241-s003.pdf [file peerj-03-1241-s003.pdf]
