# Supplementary material for: Partitioning the impact of environment and spatial structure on alpha and beta components of taxonomic, functional, and phylogenetic diversity in European ants
Source: PubMed Central journal article supplement (PMC4592154; doi:10.7717/peerj.1241), 2015-09-29
Supplement: peerj-03-1241-s004.pdf [file peerj-03-1241-s004.pdf]

| SPECIES                        | WS    | WP   | Diur | Dom | pS | pI   | pLF  | FSI | FSG | FSC | CS    | nQ  | nN  | CFT |
|--------------------------------|-------|------|------|-----|----|------|------|-----|-----|-----|-------|-----|-----|-----|
| <b>Formicinae</b>              |       |      |      |     |    |      |      |     |     |     |       |     |     |     |
| <i>Camponotus aethiops</i>     | 7.50  | 0.67 | 0    | 1   | 0  | 0.25 | 0.75 | 0   | 1   | 0   | 7.47  | 0   | 0   | 1   |
| <i>Camponotus amaurus</i>      | 6.10  | 0.69 | 1    | 0   | 0  | 0    | 1    | 0   | 1   | 0   | 5.99  | 0   | 1   | 1   |
| <i>Camponotus cruentatus</i>   | 10.00 | 0.80 | 0    | 1   | 0  | 0.25 | 0.75 | 0   | 1   | 0   | 8.52  | 0   | 0   | 1   |
| <i>Camponotus gestroi</i>      | 6.10  | 0.59 | 0    | 0   | 0  | 0    | 1    | 0   | 1   | 0   | 6.21  | 0   | 0   | 1   |
| <i>Camponotus fallax</i>       | 6.90  | 0.41 | 0    | 0   | 0  | 0    | 1    | 0   | 1   | 0   | 6.21  | 0   | 0   | 1   |
| <i>Camponotus figaro</i>       | 3.90  | 0.44 | 1    | 0   | 0  | 0    | 1    | 0   | 1   | 0   | 6.21  | 0   | 0   | 1   |
| <i>Camponotus foreli</i>       | 6.10  | 0.69 | 1    | 0   | 0  | 0    | 1    | 0   | 1   | 0   | 5.99  | 0   | 1   | 1   |
| <i>Camponotus herculeanus</i>  | 10.80 | 0.69 | 0    | 1   | 0  | 0.25 | 0.75 | 0   | 1   | 0   | 8.52  | 0.5 | 0   | 1   |
| <i>Camponotus lateralis</i>    | 5.00  | 0.40 | 1    | 0   | 0  | 0    | 1    | 0   | 1   | 0   | 6.91  | 0   | 0   | 1   |
| <i>Camponotus ligniperdus</i>  | 9.00  | 0.67 | 0    | 1   | 0  | 0.25 | 0.75 | 0   | 1   | 0   | 7.82  | 0.5 | 0   | 1   |
| <i>Camponotus micans</i>       | 8.50  | 1.29 | 0    |     | 0  | 0    | 1    | 0   | 1   | 0   | 6.91  | 0   | 0   | 1   |
| <i>Camponotus piceus</i>       | 3.90  | 0.44 | 1    | 0   | 0  | 0    | 1    | 0   | 1   | 0   | 6.21  | 0   | 0   | 1   |
| <i>Camponotus pilicornis</i>   | 8.50  | 0.82 | 0    | 1   | 0  | 0    | 1    | 0   | 1   | 0   | 6.91  | 0   | 0   | 1   |
| <i>Camponotus sylvaticus</i>   | 8.00  | 0.75 | 0    | 1   | 0  | 0    | 1    | 0   | 1   | 0   | 6.91  | 0   | 0   | 1   |
| <i>Camponotus truncatus</i>    | 4.50  | 0.67 | 0    | 0   | 0  | 0    | 1    | 1   | 0   | 0   | 5.70  | 0   | 0   | 1   |
| <i>Camponotus vagus</i>        | 9.40  | 0.68 | 0    | 1   | 0  | 0.25 | 0.75 | 0   | 1   | 0   | 7.82  | 1   | 0   | 1   |
| <i>Cataglyphis aenescens</i>   | 5.55  | 0.88 | 1    | 0   | 0  | 1    | 0    | 1   | 0   | 0   | 6.91  | 0   | 0   | 1   |
| <i>Cataglyphis cursor</i>      | 6.70  | 0.61 | 1    | 0   | 0  | 1    | 0    | 1   | 0   | 0   | 6.62  | 0   | 0   | 0   |
| <i>Cataglyphis floricola</i>   | 6.00  | 0.22 | 1    | 0   | 0  | 1    | 0    | 1   | 0   | 0   | 5.52  | 0   | 0   | 0   |
| <i>Cataglyphis hispanica</i>   | 8.50  | 0.93 | 1    | 0   | 0  | 1    | 0    | 1   | 0   | 0   | 6.62  | 0   | 0   | 0   |
| <i>Cataglyphis iberica</i>     | 6.00  | 0.50 | 1    | 0   | 0  | 1    | 0    | 1   | 0   | 0   | 6.48  | 0   | 1   | 1   |
| <i>Cataglyphis rosenhaueri</i> | 6.00  | 0.50 | 1    | 0   | 0  | 1    | 0    | 1   | 0   | 0   | 6.40  | 0   | 1   | 1   |
| <i>Cataglyphis velox</i>       | 8.30  | 0.90 | 1    | 0   | 0  | 1    | 0    | 1   | 0   | 0   | 6.62  | 0.5 | 0.5 | 0   |
| <i>Formica aquilonia</i>       | 6.60  | 0.76 | 0    | 1   | 0  | 0.5  | 0.5  | 0   | 0   | 1   | 12.90 | 1   | 1   | 0   |
| <i>Formica cinerea</i>         | 5.30  | 0.66 | 0    | 1   | 0  | 0.5  | 0.5  | 0   | 0   | 1   | 8.52  | 0.5 | 1   | 0   |
| <i>Formica clara</i>           | 6.50  | 0.46 | 1    | 1   | 0  | 0.5  | 0.5  | 0   | 1   | 0   | 8.52  | 0   | 0   | 1   |
| <i>Formica cunicularia</i>     | 5.30  | 0.47 | 1    | 0   | 0  | 0.5  | 0.5  | 0   | 1   | 0   | 7.24  | 0   | 0.5 | 1   |
| <i>Formica decipiens</i>       | 5.60  | 0.41 | 1    | 0   | 0  | 0.5  | 0.5  | 0   | 1   | 0   | 7.13  | 0   | 0   | 1   |
| <i>Formica fusca</i>           | 5.00  | 0.60 | 1    | 0   | 0  | 0.5  | 0.5  | 0   | 1   | 0   | 9.10  | 1   | 1   | 1   |
| <i>Formica gagates</i>         | 5.00  | 0.60 | 1    | 0   | 0  | 0.5  | 0.5  | 0   | 1   | 0   | 6.21  | 0   | 0   | 1   |
| <i>Formica gerardi</i>         | 5.50  | 0.36 | 1    | 0   | 0  | 0.5  | 0.5  | 0   | 1   | 0   | 7.13  | 0   | 0   | 1   |
| <i>Formica lemani</i>          | 5.50  | 0.38 | 1    | 0   | 0  | 0.5  | 0.5  | 0   | 1   | 0   | 7.47  | 0   | 0   | 1   |
| <i>Formica lugubris</i>        | 6.50  | 0.77 | 0    | 1   | 0  | 0.5  | 0.5  | 0   | 0   | 1   | 10.60 | 1   | 1   | 0.5 |
| <i>Formica lusatica</i>        | 6.50  | 0.46 | 1    | 1   | 0  | 0.5  | 0.5  | 0   | 1   | 0   | 8.52  | 0   | 0   | 1   |
| <i>Formica nigricans</i>       | 6.50  | 0.77 | 0    | 1   | 0  | 0.5  | 0.5  | 0   | 0   | 1   | 11.00 | 1   | 1   | 0   |
| <i>Formica polycтена</i>       | 6.50  | 0.77 | 0    | 1   | 0  | 0.5  | 0.5  | 0   | 0   | 1   | 13.02 | 1   | 1   | 0   |
| <i>Formica pratensis</i>       | 6.50  | 0.77 | 0    | 1   | 0  | 0.5  | 0.5  | 0   | 0   | 1   | 11.00 | 1   | 1   | 0   |
| <i>Formica rufa</i>            | 6.50  | 0.77 | 0    | 1   | 0  | 0.5  | 0.5  | 0   | 0   | 1   | 9.21  | 1   | 1   | 0   |
| <i>Formica rufibarbis</i>      | 6.00  | 0.50 | 1    | 0   | 0  | 0.5  | 0.5  | 0   | 1   | 0   | 6.91  | 0   | 0   | 1   |
| <i>Formica sanguinea</i>       | 7.50  | 0.40 | 1    | 1   | 0  | 0.5  | 0.5  | 0   | 0   | 1   | 9.21  | 0.5 | 0   | 0.5 |
| <i>Formica subrufa</i>         | 4.90  | 0.29 | 1    | 0   | 0  | 0.75 | 0.25 | 0   | 1   | 0   | 6.55  | 0   | 0   | 1   |
| <i>Formica transcaucasica</i>  | 3.90  | 0.62 | 0    | 0   | 0  | 0.5  | 0.5  | 0   | 1   | 0   | 7.60  | 0   | 1   | 0   |
| <i>Formica truncorum</i>       | 6.30  | 0.87 | 0    | 1   | 0  | 0.5  | 0.5  | 0   | 0   | 1   | 9.21  | 1   | 1   | 0   |
| <i>Formica uralensis</i>       | 6.30  | 0.40 | 0    | 0   | 0  | 0.5  | 0.5  | 0   | 0   | 1   |       | 1   | 1   | 0   |
| <i>Lasius alienus</i>          | 2.80  | 0.50 | 0    | 1   | 0  | 0.25 | 0.75 | 0   | 0   | 1   | 9.47  | 0   | 0   | 1   |
| <i>Lasius balcanicus</i>       | 5.50  | 0.36 | 0    |     | 0  | 0.25 | 0.75 | 0   | 0   | 1   | 9.90  | 0   | 0   | 1   |
| <i>Lasius brunneus</i>         | 2.90  | 0.62 | 0    | 0   | 0  | 0.25 | 0.75 | 0   | 0   | 1   | 9.21  | 0   | 0   | 1   |
| <i>Lasius cinereus</i>         | 3.30  | 0.45 | 0    | 1   | 0  | 0    | 1    | 0   | 0   | 1   | 9.21  | 0   | 0   | 1   |

|                                     |      |      |   |   |      |      |      |   |   |   |       |     |     |     |
|-------------------------------------|------|------|---|---|------|------|------|---|---|---|-------|-----|-----|-----|
| <i>Lasius emarginatus</i>           | 3.20 | 0.47 | 0 | 1 | 0    | 0.25 | 0.75 | 0 | 0 | 1 | 9.21  | 0   | 0   | 1   |
| <i>Lasius flavus</i>                | 2.90 | 0.79 | 0 | 0 | 0    | 0.25 | 0.75 | 0 | 0 | 1 | 9.21  | 0.5 | 0   | 1   |
| <i>Lasius fuliginosus</i>           | 4.00 | 0.50 | 0 | 1 | 0    | 0.25 | 0.75 | 0 | 0 | 1 | 14.73 | 0   | 0   | 0   |
| <i>Lasius grandis</i>               | 3.50 | 0.57 | 0 | 1 | 0    | 0.25 | 0.75 | 0 | 0 | 1 | 9.21  | 0   | 0   | 1   |
| <i>Lasius lasioides</i>             | 2.80 | 0.50 | 0 | 1 | 0    | 0.25 | 0.75 | 0 | 0 | 1 | 9.47  | 0   | 0   | 1   |
| <i>Lasius myops</i>                 | 2.90 | 0.79 | 0 | 0 | 0    | 0    | 1    | 0 | 0 | 1 | 8.52  | 0   | 0   | 1   |
| <i>Lasius niger</i>                 | 3.00 | 0.67 | 0 | 1 | 0    | 0.25 | 0.75 | 0 | 0 | 1 | 9.21  | 0   | 0   | 1   |
| <i>Lasius paralienus</i>            | 4.50 | 0.44 | 0 | 1 | 0    | 0.25 | 0.75 | 0 | 0 | 1 | 9.21  | 0   | 0   | 1   |
| <i>Lasius psammophilus</i>          | 3.40 | 0.59 | 0 | 0 | 0    | 0.25 | 0.75 | 0 | 0 | 1 | 10.43 | 0   | 1   | 1   |
| <i>Plagiolepis pygmaea</i>          | 1.60 | 0.50 | 0 | 0 | 0    | 0    | 1    | 0 | 1 | 0 | 6.68  | 1   | 0.5 | 0   |
| <i>Plagiolepis schmitzii</i>        | 2.10 | 0.48 | 1 | 0 | 0    | 0    | 1    | 0 | 1 | 0 | 6.68  | 1   | 0.5 | 0   |
| <i>Proformica ferreri</i>           | 4.50 | 0.73 | 1 | 0 | 0    | 1    | 0    | 1 | 0 | 0 | 6.48  | 0   | 0   |     |
| <i>Proformica nasuta</i>            | 5.00 | 1.00 | 1 | 0 | 0    | 1    | 0    | 1 | 0 | 0 | 6.48  | 0   | 0   |     |
| <b>Dolichoderinae</b>               |      |      |   |   |      |      |      |   |   |   |       |     |     |     |
| <i>Dolichoderus quadripunctatus</i> | 3.50 | 0.29 | 0 | 0 | 0    | 0.5  | 0.5  | 0 | 0 | 1 | 6.11  | 0   | 1   | 0   |
| <i>Linepithema humile</i>           | 2.30 | 0.22 | 0 | 1 | 0    | 0.25 | 0.75 | 0 | 0 | 1 | 11.92 | 1   | 1   | 0   |
| <i>Liometopum microcephalum</i>     | 5.00 | 0.80 | 0 | 1 | 0    | 0.75 | 0.25 | 0 | 0 | 1 | 8.52  | 0   | 0   | 1   |
| <i>Tapinoma erraticum</i>           | 2.80 | 0.54 | 0 | 1 | 0    | 0    | 1    | 0 | 0 | 1 | 8.16  | 1   | 1   | 0   |
| <i>Tapinoma nigerrimum</i>          | 4.00 | 0.58 | 0 | 1 | 0    | 0    | 1    | 0 | 0 | 1 | 8.85  | 1   | 1   | 0   |
| <i>Tapinoma simrothi</i>            | 3.20 | 0.44 | 0 | 1 | 0    | 0    | 1    | 0 | 0 | 1 | 8.85  | 1   | 1   | 0   |
| <b>Myrmicinae</b>                   |      |      |   |   |      |      |      |   |   |   |       |     |     |     |
| <i>Aphaenogaster dulcinea</i>       | 6.00 | 0.33 | 0 | 0 | 0.5  | 0.5  | 0    | 0 | 1 | 0 | 6.48  | 0   | 0   |     |
| <i>Aphaenogaster gibbosa</i>        | 4.90 | 0.41 | 1 | 0 | 0.5  | 0.5  | 0    | 0 | 1 | 0 | 6.48  | 0   | 0   | 1   |
| <i>Aphaenogaster iberica</i>        | 6.40 | 0.19 | 1 | 0 | 0.5  | 0.5  | 0    | 0 | 1 | 0 | 6.25  | 0   | 0   | 0   |
| <i>Aphaenogaster cardenai</i>       | 6.70 | 0.10 | 0 | 0 | 0.5  | 0.5  | 0    | 0 | 1 | 0 | 8.01  | 0   | 0   | 1   |
| <i>Aphaenogaster senilis</i>        | 7.00 | 0.14 | 1 | 0 | 0.5  | 0.5  | 0    | 0 | 1 | 0 | 6.48  | 0   | 0   | 0   |
| <i>Aphaenogaster subterranea</i>    | 3.80 | 0.45 | 0 | 0 | 0.5  | 0.5  | 0    | 0 | 1 | 0 | 7.60  | 0   | 0   | 1   |
| <i>Cardiocondyla batesii</i>        | 2.10 | 0.24 | 0 | 0 | 0    | 0.75 | 0.25 | 0 | 1 | 0 | 4.79  | 0   | 0   | 1   |
| <i>Cardiocondyla mauritanica</i>    | 2.00 | 0.20 | 0 | 0 | 0    | 0.75 | 0.25 | 0 | 1 | 0 | 5.01  | 1   | 0   | 0   |
| <i>Crematogaster auberti</i>        | 3.40 | 0.35 | 0 | 1 | 0    | 0    | 1    | 0 | 1 | 0 | 6.48  | 0   | 0   | 0   |
| <i>Crematogaster scutellaris</i>    | 4.05 | 0.57 | 0 | 1 | 0    | 0.5  | 0.5  | 0 | 0 | 1 | 6.62  | 0.5 | 0.5 | 1   |
| <i>Crematogaster sordidula</i>      | 2.45 | 0.37 | 0 | 1 | 0    | 0    | 1    | 0 | 1 | 0 | 6.62  | 0   | 0   | 1   |
| <i>Gonionmma baeticum</i>           | 4.10 | 0.24 | 0 | 0 | 1    | 0    | 0    | 1 | 0 | 0 | 5.86  | 0   | 0   | 1   |
| <i>Gonionmma blanci</i>             | 3.50 | 0.29 | 0 | 0 | 1    | 0    | 0    | 1 | 0 | 0 | 5.86  | 0   | 0   | 1   |
| <i>Gonionmma collingwoodi</i>       | 3.65 | 0.08 | 0 | 0 | 1    | 0    | 0    | 1 | 0 | 0 | 5.86  | 0   | 0   | 1   |
| <i>Gonionmma hispanicum</i>         | 3.90 | 0.21 | 0 | 0 | 1    | 0    | 0    | 1 | 0 | 0 | 5.86  | 0   | 0   | 1   |
| <i>Gonionmma kugleri</i>            | 3.10 | 0.19 | 0 | 0 | 1    | 0    | 0    | 1 | 0 | 0 | 5.89  | 0   | 0   | 1   |
| <i>Gonionmma thoracicum</i>         | 3.90 | 0.21 | 0 | 0 | 1    | 0    | 0    | 1 | 0 | 0 | 5.86  | 0   | 0   | 1   |
| <i>Leptothorax acervorum</i>        | 3.60 | 0.17 | 0 | 0 | 0    | 0.5  | 0.5  | 0 | 1 | 0 | 7.60  | 1   | 0   | 0   |
| <i>Leptothorax gredleri</i>         | 3.20 | 0.16 | 0 | 0 | 0    | 0.5  | 0.5  | 0 | 1 | 0 | 3.91  | 0   | 0   | 0.5 |
| <i>Leptothorax muscorum</i>         | 2.90 | 0.55 | 0 | 0 | 0    | 0.5  | 0.5  | 0 | 1 | 0 | 5.70  | 1   | 0   | 0   |
| <i>Manica rubida</i>                | 7.00 | 0.71 | 1 | 0 | 0    | 1    | 0    | 0 | 0 | 1 | 8.16  | 0.5 | 0   | 1   |
| <i>Messor barbarus</i>              | 7.90 | 1.04 | 0 | 1 | 1    | 0    | 0    | 0 | 0 | 1 | 8.99  | 0   | 0   | 1   |
| <i>Messor celiae</i>                | 7.90 | 1.04 | 0 | 1 | 1    | 0    | 0    | 0 | 0 | 1 | 8.99  | 0   | 0   | 1   |
| <i>Messor bouvieri</i>              | 6.30 | 0.71 | 1 | 0 | 1    | 0    | 0    | 0 | 0 | 1 | 8.16  | 0   | 0   | 1   |
| <i>Messor maroccanus</i>            | 6.30 | 0.71 | 1 | 0 | 1    | 0    | 0    | 0 | 0 | 1 | 8.16  | 0   | 0   | 1   |
| <i>Messor capitatus</i>             | 8.40 | 1.07 | 0 | 1 | 1    | 0    | 0    | 0 | 1 | 0 | 8.29  | 0   | 0   | 1   |
| <i>Messor hispanicus</i>            | 7.90 | 1.04 | 0 | 1 | 1    | 0    | 0    | 0 | 0 | 1 | 8.99  | 0   | 0   | 1   |
| <i>Messor lusitanicus</i>           | 6.50 | 0.54 | 1 | 0 | 1    | 0    | 0    | 0 | 0 | 1 | 8.16  | 0   | 0   | 1   |
| <i>Messor structor</i>              | 6.80 | 0.81 | 0 | 1 | 1    | 0    | 0    | 0 | 0 | 1 | 8.29  | 1   | 0   | 0   |
| <i>Monomorium salomonis</i>         | 3.05 | 0.36 | 0 | 1 | 0.25 | 0.75 | 0    | 0 | 0 | 1 | 8.01  | 1   | 1   | 0   |
| <i>Myrmecina graminicola</i>        | 3.05 | 0.36 | 0 | 0 | 0    | 0.75 | 0.25 | 1 | 0 | 0 | 4.61  | 0.5 | 0   | 0   |

|                                  |      |      |   |   |      |      |      |   |   |   |      |     |     |     |
|----------------------------------|------|------|---|---|------|------|------|---|---|---|------|-----|-----|-----|
| <i>Myrmica aloba</i>             | 4.50 | 0.22 | 0 | 0 | 0    | 0.5  | 0.5  | 0 | 0 | 1 | 7.60 | 0   | 0   | 0.5 |
| <i>Myrmica hellenica</i>         |      |      | 0 | 0 | 0    | 0.5  | 0.5  | 0 | 0 | 1 | 7.38 | 0.5 | 0   | 0.5 |
| <i>Myrmica lobulicornis</i>      | 3.75 | 0.27 | 0 | 0 | 0    | 0.5  | 0.5  | 0 | 0 | 1 | 7.31 | 1   | 0   | 0.5 |
| <i>Myrmica lonae</i>             | 4.40 | 0.14 | 0 | 0 | 0    | 0.5  | 0.5  | 0 | 0 | 1 | 8.01 | 1   | 0   | 0.5 |
| <i>Myrmica rubra</i>             | 4.00 | 0.25 | 0 |   | 0    | 0.5  | 0.5  | 0 | 0 | 1 | 8.01 | 1   | 1   | 0.5 |
| <i>Myrmica ruginodis</i>         | 4.75 | 0.11 | 0 | 0 | 0    | 0.5  | 0.5  | 0 | 0 | 1 | 7.60 | 0.5 | 0   | 0.5 |
| <i>Myrmica rugulosa</i>          | 4.00 | 0.25 | 0 | 0 | 0    | 0.5  | 0.5  | 0 | 0 | 1 | 7.60 | 1   | 1   | 0.5 |
| <i>Myrmica sabuleti</i>          | 4.40 | 0.14 | 0 | 0 | 0    | 0.5  | 0.5  | 0 | 0 | 1 | 8.01 | 1   | 0   | 0.5 |
| <i>Myrmica scabrinodis</i>       | 4.25 | 0.24 | 0 | 0 | 0    | 0.5  | 0.5  | 0 | 0 | 1 | 7.31 | 0.5 | 0   | 0.5 |
| <i>Myrmica schencki</i>          | 4.15 | 0.51 | 0 | 0 | 0    | 0.5  | 0.5  | 0 | 0 | 1 | 6.91 | 0.5 | 0   | 0.5 |
| <i>Myrmica specioides</i>        | 5.60 | 0.18 | 0 | 0 | 0    | 0.5  | 0.5  | 0 | 0 | 1 | 7.31 | 1   | 0   | 0.5 |
| <i>Myrmica spinosior</i>         | 4.40 | 0.14 | 0 | 0 | 0    | 0.5  | 0.5  | 0 | 0 | 1 | 8.01 | 1   | 0   | 0.5 |
| <i>Myrmica sulcinodis</i>        | 4.75 | 0.32 | 0 | 0 | 0    | 0.5  | 0.5  | 0 | 0 | 1 | 6.68 | 0   | 0.5 | 0.5 |
| <i>Myrmica wesmaeli</i>          | 3.80 | 0.26 | 0 | 0 | 0    | 0.5  | 0.5  | 0 | 0 | 1 | 7.31 | 1   | 0   | 0.5 |
| <i>Oxyopomyrmex saulcyi</i>      | 2.00 | 0.20 | 0 | 0 | 1    | 0    | 0    | 1 | 0 | 0 | 4.61 | 0   | 0   | 1   |
| <i>Pheidole pallidula</i>        | 3.20 | 1.03 | 0 | 1 | 0.25 | 0.75 | 0    | 0 | 0 | 1 | 8.52 | 0.5 | 0   | 0.5 |
| <i>Stenamma orousetti</i>        | 3.30 | 0.18 | 0 | 0 | 0    | 1    | 0    | 1 | 0 | 0 | 4.61 | 0   | 0   | 1   |
| <i>Stenamma westwoodi</i>        | 3.30 | 0.18 | 0 | 0 | 0    | 1    | 0    | 1 | 0 | 0 | 4.61 | 0   | 0   | 1   |
| <i>Stenamma petiolatum</i>       | 4.50 | 0.13 | 0 | 0 | 0    | 1    | 0    | 1 | 0 | 0 | 4.61 | 0   | 0   | 1   |
| <i>Temnothorax angustulus</i>    | 2.80 | 0.21 | 0 | 0 | 0    | 0.5  | 0.5  | 0 | 1 | 0 | 3.91 | 0   | 0   | 1   |
| <i>Temnothorax caesari</i>       | 2.20 | 0.18 | 0 | 0 | 0    | 0.5  | 0.5  | 0 | 1 | 0 | 4.61 | 0   | 0   |     |
| <i>Temnothorax clypeatus</i>     | 3.00 | 0.33 | 0 | 0 | 0    | 0.5  | 0.5  | 0 | 1 | 0 | 4.61 | 0   | 0   | 1   |
| <i>Temnothorax crassispinus</i>  | 2.90 | 0.41 | 0 | 0 | 0    | 0.5  | 0.5  | 0 | 1 | 0 | 4.61 | 0   | 0   | 0.5 |
| <i>Temnothorax exilis</i>        | 2.60 | 0.46 | 0 | 0 | 0    | 0.5  | 0.5  | 0 | 1 | 0 | 3.91 | 0   | 0   | 1   |
| <i>Temnothorax fuentei</i>       | 4.15 | 0.07 | 0 | 0 | 0    | 0.5  | 0.5  | 0 | 1 | 0 | 3.91 | 0   | 0   | 1   |
| <i>Temnothorax gredosi</i>       | 2.50 | 0.32 | 0 | 0 | 0    | 0.5  | 0.5  | 0 | 1 | 0 | 5.01 | 0   | 0   | 1   |
| <i>Temnothorax grouvellei</i>    | 2.85 | 0.46 | 0 | 0 | 0    | 0.5  | 0.5  | 0 | 1 | 0 | 4.61 | 0   | 0   | 1   |
| <i>Temnothorax interruptus</i>   | 2.30 | 0.52 | 0 | 0 | 0    | 0.5  | 0.5  | 0 | 1 | 0 | 5.01 | 1   | 0   | 0   |
| <i>Temnothorax krausseii</i>     | 2.80 | 0.21 | 0 | 0 | 0    | 0.5  | 0.5  | 0 | 1 | 0 | 3.91 | 0   | 0   | 1   |
| <i>Temnothorax lichtensteini</i> | 2.60 | 0.08 | 0 | 0 | 0    | 0.5  | 0.5  | 0 | 1 | 0 | 5.30 | 0   | 0   | 1   |
| <i>Temnothorax luteus</i>        | 2.40 | 0.25 | 0 | 0 | 0    | 0.5  | 0.5  | 0 | 1 | 0 |      | 0   | 0   | 1   |
| <i>Temnothorax niger</i>         | 2.65 | 0.34 | 0 | 0 | 0    | 0.5  | 0.5  | 0 | 1 | 0 | 5.01 | 0   | 0   | 1   |
| <i>Temnothorax nigriceps</i>     | 2.65 | 0.26 | 0 | 0 | 0    | 0.5  | 0.5  | 0 | 1 | 0 | 5.01 | 0   | 0   | 1   |
| <i>Temnothorax nylanderi</i>     | 2.65 | 0.30 | 0 | 0 | 0    | 0.5  | 0.5  | 0 | 1 | 0 | 5.70 | 0   | 0   | 1   |
| <i>Temnothorax pardoi</i>        | 2.50 | 0.08 | 0 | 0 | 0    | 0.5  | 0.5  | 0 | 1 | 0 | 5.01 | 0   | 0   | 1   |
| <i>Temnothorax parvulus</i>      | 2.45 | 0.12 | 1 | 0 | 0    | 0.5  | 0.5  | 0 | 1 | 0 | 6.40 | 0   | 0   | 1   |
| <i>Temnothorax rabaudi</i>       | 2.70 | 0.22 | 0 | 0 | 0    | 0.5  | 0.5  | 0 | 1 | 0 | 5.01 | 0   | 0   | 1   |
| <i>Temnothorax racovitzai</i>    | 2.55 | 0.12 | 0 | 0 | 0    | 0.5  | 0.5  | 0 | 1 | 0 | 5.01 | 0   | 0   | 1   |
| <i>Temnothorax recedens</i>      | 2.70 | 0.30 | 1 | 0 | 0    | 0.5  | 0.5  | 0 | 1 | 0 | 5.01 | 0   | 0   | 0   |
| <i>Temnothorax specularis</i>    | 2.35 | 0.13 | 0 | 0 | 0    | 0.5  | 0.5  | 0 | 1 | 0 | 5.01 | 0   | 0   | 1   |
| <i>Temnothorax tristis</i>       | 2.50 | 0.40 | 0 | 0 | 0    | 0.5  | 0.5  | 0 | 1 | 0 | 5.01 | 1   | 0   | 1   |
| <i>Temnothorax tubereum</i>      | 2.85 | 0.39 | 0 | 0 | 0    | 0.5  | 0.5  | 0 | 1 | 0 | 5.30 | 0   | 0.5 | 1   |
| <i>Temnothorax thyndalei</i>     | 2.65 | 0.19 | 0 | 0 | 0    | 0.5  | 0.5  | 0 | 1 | 0 | 5.01 | 0   | 0   | 1   |
| <i>Temnothorax unifasciatus</i>  | 2.50 | 0.40 | 0 | 0 | 0    | 0.5  | 0.5  | 0 | 1 | 0 | 5.78 | 0   | 0   | 1   |
| <i>Tetramorium caespitum</i>     | 2.90 | 0.41 | 0 | 1 | 0.25 | 0.75 | 0    | 0 | 0 | 1 | 9.21 | 0   | 0   | 1   |
| <i>Tetramorium impurum</i>       | 2.90 | 0.41 | 0 | 1 | 0.25 | 0.75 | 0    | 0 | 0 | 1 | 9.21 | 0   | 0   | 1   |
| <i>Tetramorium forte</i>         | 3.75 | 0.51 | 0 | 1 | 0.25 | 0.5  | 0.25 | 0 | 0 | 1 | 9.21 | 0   | 0   | 1   |
| <i>Tetramorium hispanicum</i>    | 3.75 | 0.51 | 0 | 1 | 0.25 | 0.5  | 0.25 | 0 | 0 | 1 | 9.21 | 0   | 0   | 1   |
| <i>Tetramorium ruginode</i>      | 3.75 | 0.51 | 0 | 1 | 0.25 | 0.5  | 0.25 | 0 | 0 | 1 | 9.21 | 0   | 0   | 1   |
| <i>Tetramorium semilaeve</i>     | 3.60 | 0.33 | 0 | 1 | 0.25 | 0.75 | 0    | 0 | 0 | 1 | 9.21 | 1   | 0   | 1   |
| <i>Tetramorium punicum</i>       | 3.60 | 0.33 | 0 | 1 | 0.25 | 0.75 | 0    | 0 | 0 | 1 | 9.21 | 1   | 0   | 1   |

**Ponerinae**

|                                 |      |      |   |   |   |      |      |   |   |   |      |   |   |     |
|---------------------------------|------|------|---|---|---|------|------|---|---|---|------|---|---|-----|
| <i>Hypoponera eduardi</i>       | 2.85 | 0.18 | 0 | 0 | 0 | 1    | 0    | 0 | 1 | 0 | 7.31 | 1 | 0 | 1   |
| <i>Hypoponera punctatissima</i> | 3.15 | 0.16 | 0 | 0 | 0 | 1    | 0    | 0 | 1 | 0 | 5.01 | 1 | 1 | 0.5 |
| <i>Ponera coarctata</i>         | 2.95 | 0.31 | 0 | 0 | 0 | 1    | 0    | 0 | 1 | 0 | 4.61 | 1 | 0 | 0   |
| <b>Pseudomyrmicinae</b>         |      |      |   |   |   |      |      |   |   |   |      |   |   |     |
| <i>Tetraponera allaborans</i>   |      |      |   | 0 | 0 | 0.75 | 0.25 |   |   |   | 6.62 | 0 | 0 | 0.5 |
| <b>Leptanillinae</b>            |      |      |   |   |   |      |      |   |   |   |      |   |   |     |
| <i>Leptanilla revelieri</i>     | 1.15 | 0.09 | 0 | 0 | 0 | 1    | 0    | 0 | 1 | 0 | 5.70 | 0 | 0 | 0   |
