# Supplementary material for: Partitioning the impact of environment and spatial structure on alpha and beta components of taxonomic, functional, and phylogenetic diversity in European ants
Source: PubMed Central journal article supplement (PMC4592154; doi:10.7717/peerj.1241), 2015-09-29
Supplement: peerj-03-1241-s005.pdf [file peerj-03-1241-s005.pdf]

| <b>Trait</b>                                              | <b>Data type</b> | <b>States</b>                                                        |
|-----------------------------------------------------------|------------------|----------------------------------------------------------------------|
| Worker size                                               | Continuous       | Worker body size from the tip of mandibles to tip of the gaster (mm) |
| Worker polymorphism                                       | Continuous       | Mean worker size divided by the range of worker size                 |
| Diurnality                                                | Binary           | (0) Non-strictly diurnal<br>(1) Strictly diurnal                     |
| Behavioral dominance                                      | Binary           | (0) Subordinate<br>(1) Dominant                                      |
| Diet: Seed-eating, Insect-eating, and Liquid-food eating  | Fuzzy-coded (*)  | 0-1 (for each of the three categories)                               |
| Foraging strategy: Individual, Group, and Collective (**) | Binary           | 0-1 (for each of the three categories)                               |
| Colony size                                               | Continuous       | Mean number of workers per colony                                    |
| Number of queens                                          | Ordinal          | (0) Monogyny; (0.5) Both monogyny and polygyny; (1) Polygyny         |
| Number of nests                                           | Ordinal          | (0) Monodomy; (0.5) Both monodomy and polydomy; (1) Polydomy         |
| Colony foundation type                                    | Ordinal          | (0) DCF; (0.5) Both DCF and ICF; (1) ICF                             |
