# Supplementary material for: Partitioning the impact of environment and spatial structure on alpha and beta components of taxonomic, functional, and phylogenetic diversity in European ants
Source: PubMed Central journal article supplement (PMC4592154; doi:10.7717/peerj.1241), 2015-09-29
Supplement: peerj-03-1241-s007.pdf [file peerj-03-1241-s007.pdf]

| <b>Trait</b>                  | <b>Pagel's <math>\lambda</math></b> |
|-------------------------------|-------------------------------------|
| Worker size                   | <b>0.97***</b>                      |
| Worker polymorphism           | <b>0.91***</b>                      |
| Colony size                   | <b>0.97***</b>                      |
| % Seeds in diet               | <b>1.00***</b>                      |
| % Insects in diet             | <b>0.99***</b>                      |
| % Liquid Foods in diet        | <b>0.97***</b>                      |
| Independent Colony Foundation | <b>0.92***</b>                      |
| Polydomy                      | <b>0.78***</b>                      |
| Polygyny                      | <b>0.85***</b>                      |
| Strictly diurnal              | <b>0.97***</b>                      |
| Dominant                      | <b>0.99***</b>                      |
| Foraging strategy             | <b>1.00***</b>                      |
