# Supplementary material for: Partitioning the impact of environment and spatial structure on alpha and beta components of taxonomic, functional, and phylogenetic diversity in European ants
Source: PeerJ. 2015 Sep 29;3:e1241. doi: 10.7717/peerj.1241 (PMC4592154; doi:10.7717/peerj.1241)
Supplement: Supplemental Information 8 [file peerj-03-1241-s008.xlsx]

## Sheet: sppxtraitsKK
Species	WS	WP	lnCS	pSeeds	pInsects	pLiquidFood	ICF	Polygyny	Polydomy	BroodCycle2	RFW	DiurnalitySD	Dominant	FS_Ind	FS_Group	FS_Collective	FS
Camponotus_aethiops	7.5	0.666667	7.46737	0	0.25	0.75	1	0	0	1	1.66667	0	1	0	1	0	g
Camponotus_amaurus	6.1	0.688525	5.99146	0	0	1	1	0	1	1	1.47541	1	0	0	1	0	g
Camponotus_cruentatus	10	0.8	8.51719	0	0.25	0.75	1	0	0	1	1.5	0	1	0	1	0	g
Camponotus_gestroi	6.1	0.590164	6.21461	0	0	1	1	0	0	1	1.68033	0	0	0	1	0	g
Camponotus_fallax	6.9	0.405797	6.21461	0	0	1	1	0	0	1	1.32609	0	0	0	1	0	g
Camponotus_figaro	3.9	0.435897	6.21461	0	0	1	1	0	0	1	2.33333	1	0	0	1	0	g
Camponotus_foreli	6.1	0.688525	5.99146	0	0	1	1	0	1	1	1.47541	1	0	0	1	0	g
Camponotus_herculeanus	10.8	0.685185	8.51719	0	0.25	0.75	1	0.5	0	1	1.43519	0	1	0	1	0	g
Camponotus_lateralis	5	0.4	6.90776	0	0	1	1	0	0	1	1.8	1	0	0	1	0	g
Camponotus_ligniperdus	9	0.666667	7.82405	0	0.25	0.75	1	0.5	0	1	1.83333	0	1	0	1	0	g
Camponotus_micans	8.5	1.29412	6.90776	0	0	1	1	0	0	1	1.64706	0		0	1	0	g
Camponotus_piceus	3.9	0.435897	6.21461	0	0	1	1	0	0	1	2.33333	1	0	0	1	0	g
Camponotus_pilicornis	8.5	0.823529	6.90776	0	0	1	1	0	0	1	1.76471	0	1	0	1	0	g
Camponotus_sylvaticus	8	0.75	6.90776	0	0	1	1	0	0	1	1.8125	0	1	0	1	0	g
Camponotus_truncatus	4.5	0.666667	5.70378	0	0	1	1	0	0	1	1.37778	0	0	1	0	0	i
Camponotus_vagus	9.4	0.680851	7.82405	0	0.25	0.75	1	1	0	1	1.59574	0	1	0	1	0	g
Cataglyphis_aenescens	5.55	0.882883	6.90776	0	1	0	1	0	0	0	1.63964	1	0	1	0	0	i
Cataglyphis_cursor	6.7	0.61194	6.62007	0	1	0	0	0	0	0	1.1194	1	0	1	0	0	i
Cataglyphis_floricola	6	0.216667	5.52146	0	1	0	0	0	0	0	1.01667	1	0	1	0	0	i
Cataglyphis_hispanica	8.5	0.929412	6.62007	0	1	0	0	0	0	0	1.35294	1	0	1	0	0	i
Cataglyphis_iberica	6	0.5	6.47697	0	1	0	1	0	1	0	1.7	1	0	1	0	0	i
Cataglyphis_rosenhaueri	6	0.5	6.39693	0	1	0	1	0	1	0	1.65	1	0	1	0	0	i
Cataglyphis_velox	8.3	0.903614	6.62007	0	1	0	0	0.5	0.5	0	1.3253	1	0	1	0	0	i
Formica_aquilonia	6.6	0.757576	12.8992	0	0.5	0.5	0	1	1	0	1.21212	0	1	0	0	1	c
Formica_cinerea	5.3	0.660377	8.51719	0	0.5	0.5	0	0.5	1	0	1.59434	0	1	0	0	1	c
Formica_clara	6.5	0.461538	8.51719	0	0.5	0.5	1	0	0	0	1.30769	1	1	0	1	0	g
Formica_cunicularia	5.3	0.471698	7.24423	0	0.5	0.5	1	0	0.5	0	1.50943	1	0	0	1	0	g
Formica_decipiens	5.6	0.410714	7.1309	0	0.5	0.5	1	0	0	0	1.69643	1	0	0	1	0	g
Formica_fusca	5	0.6	9.10498	0	0.5	0.5	1	1	1	0	1.7	1	0	0	1	0	g
Formica_gagates	5	0.6	6.21461	0	0.5	0.5	1	0	0	0	2	1	0	0	1	0	g
Formica_gerardi	5.5	0.363636	7.1309	0	0.5	0.5	1	0	0	0	1.45455	1	0	0	1	0	g
Formica_lemani	5.5	0.381818	7.46737	0	0.5	0.5	1	0	0	0	1.54545	1	0	0	1	0	g
Formica_lugubris	6.5	0.769231	10.5966	0	0.5	0.5	0.5	1	1	0	1.53846	0	1	0	0	1	c
Formica_lusatica	6.5	0.461538	8.51719	0	0.5	0.5	1	0	0	0	1.30769	1	1	0	1	0	g
Formica_nigricans	6.5	0.769231	11.0021	0	0.5	0.5	0	1	1	0	1.23077	0	1	0	0	1	c
Formica_polyctena	6.5	0.769231	13.017	0	0.5	0.5	0	1	1	0	1.53846	0	1	0	0	1	c
Formica_pratensis	6.5	0.769231	11.0021	0	0.5	0.5	0	1	1	0	1.23077	0	1	0	0	1	c
Formica_rufa	6.5	0.769231	9.21034	0	0.5	0.5	0	1	1	0	1.23077	0	1	0	0	1	c
Formica_rufibarbis	6	0.5	6.90776	0	0.5	0.5	1	0	0	0	1.41667	1	0	0	1	0	g
Formica_sanguinea	7.5	0.4	9.21034	0	0.5	0.5	0.5	0.5	0	0	1.33333	1	1	0	0	1	c
Formica_subrufa	4.9	0.285714	6.55108	0	0.75	0.25	1	0	0	0	2.04082	1	0	0	1	0	g
Formica_transkaucasica	3.9	0.615385	7.6009	0	0.5	0.5	0	0	1	0	2.17949	0	0	0	1	0	g
Formica_truncorum	6.3	0.873016	9.21034	0	0.5	0.5	0	1	1	0	1.34921	0	1	0	0	1	c
Formica_uralensis	6.3	0.396825		0	0.5	0.5	0	1	1	0	1.53968	0	0	0	0	1	c
Lasius_alienus	2.8	0.5	9.4727	0	0.25	0.75	1	0	0	1	2.67857	0	1	0	0	1	c
Lasius_balcanicus	5.5	0.363636	9.90349	0	0.25	0.75	1	0	0	1	1.56364	0		0	0	1	c
Lasius_brunneus	2.9	0.62069	9.21034	0	0.25	0.75	1	0	0	1	2.58621	0	0	0	0	1	c
Lasius_cinereus	3.3	0.454545	9.21034	0	0	1	1	0	0	1	2.18182	0	1	0	0	1	c
Lasius_emarginatus	3.2	0.46875	9.21034	0	0.25	0.75	1	0	0	1	2.53125	0	1	0	0	1	c
Lasius_flavus	2.9	0.793103	9.21034	0	0.25	0.75	1	0.5	0	1	2.75862	0	0	0	0	1	c
Lasius_fuliginosus	4	0.5	14.7318	0	0.25	0.75	0	0	0	1	1.5	0	1	0	0	1	c
Lasius_grandis	3.5	0.571429	9.21034	0	0.25	0.75	1	0	0	1	2.85714	0	1	0	0	1	c
Lasius_lasioides	2.8	0.5	9.4727	0	0.25	0.75	1	0	0	1	2.67857	0	1	0	0	1	c
Lasius_myops	2.9	0.793103	8.51719	0	0	1	1	0	0	1	2.75862	0	0	0	0	1	c
Lasius_niger	3	0.666667	9.21034	0	0.25	0.75	1	0	0	1	2.7	0	1	0	0	1	c
Lasius_paralienus	4.5	0.444444	9.21034	0	0.25	0.75	1	0	0	1		0	1	0	0	1	c
Lasius_psammophilus	3.4	0.588235	10.4341	0	0.25	0.75	1	0	1	1	2.67647	0	0	0	0	1	c
Plagiolepis_pygmaea	1.6	0.5	6.68461	0	0	1	0	1	0.5	1	2.25	0	0	0	1	0	g
Plagiolepis_schmitzii	2.1	0.47619	6.68461	0	0	1	0	1	0.5	1	1.61905	1	0	0	1	0	g
Proformica_ferreri	4.5	0.733333	6.47697	0	1	0		0	0	0	1.44444	1	0	1	0	0	i
Proformica_nasuta	5	1	6.47697	0	1	0		0	0	0	1.31	1	0	1	0	0	i
Dolichoderus_quadripunctatus	3.5	0.285714	6.10925	0	0.5	0.5	0	0	1	0	1.35714	0	0	0	0	1	c
Linepithema_humile	2.3	0.217391	11.9184	0	0.25	0.75	0	1	1	1	2.04348	0	1	0	0	1	c
Liometopum_microcephalum	5	0.8	8.51719	0	0.75	0.25	1	0	0	1	2.1	0	1	0	0	1	c
Tapinoma_erraticum	2.8	0.535714	8.16052	0	0	1	0	1	1	1	1.69643	0	1	0	0	1	c
Tapinoma_nigerrimum	4	0.575	8.85367	0	0	1	0	1	1	1	1.625	0	1	0	0	1	c
Tapinoma_simrothi	3.2	0.4375	8.85367	0	0	1	0	1	1	1	1.79688	0	1	0	0	1	c
Aphaenogaster_dulcineae	6	0.333333	6.47697	0.5	0.5	0		0	0	1	1.33333	0	0	0	1	0	g
Aphaenogaster_gibbosa	4.9	0.408163	6.47697	0.5	0.5	0	1	0	0	1	1.47959	1	0	0	1	0	g
Aphaenogaster_iberica	6.4	0.1875	6.25383	0.5	0.5	0	0	0	0	1	1.21875	1	0	0	1	0	g
Aphaenogaster_cardenai	6.7	0.104478	8.00637	0.5	0.5	0	1	0	0	1		0	0	0	1	0	g
Aphaenogaster_senilis	7	0.142857	6.47697	0.5	0.5	0	0	0	0	1	1.21429	1	0	0	1	0	g
Aphaenogaster_subterranea	3.8	0.447368	7.6009	0.5	0.5	0	1	0	0	1	1.97368	0	0	0	1	0	g
Cardiocondyla_batesii	2.1	0.238095	4.78749	0	0.75	0.25	1	0	0	1	1.19048	0	0	0	1	0	g
Cardiocondyla_mauritanica	2	0.2	5.01064	0	0.75	0.25	0	1	0	1	1.35	0	0	0	1	0	g
Crematogaster_auberti	3.4	0.352941	6.47697	0	0	1	0	0	0	1	2.60294	0	1	0	1	0	g
Crematogaster_scutellaris	4.05	0.567901	6.62007	0	0.5	0.5	1	0.5	0.5	1	2.16049	0	1	0	0	1	c
Crematogaster_sordidula	2.45	0.367347	6.62007	0	0	1	1	0	0	1	2.55102	0	1	0	1	0	g
Goniomma_baeticum	4.1	0.243902	5.85793	1	0	0	1	0	0	1	1.39024	0	0	1	0	0	i
Goniomma_blanci	3.5	0.285714	5.85793	1	0	0	1	0	0	1	1.44286	0	0	1	0	0	i
Goniomma_collingwoodi	3.65	0.0821918	5.85793	1	0	0	1	0	0	1	1.39726	0	0	1	0	0	i
Goniomma_hispanicum	3.9	0.205128	5.85793	1	0	0	1	0	0	1	1.34615	0	0	1	0	0	i
Goniomma_kugleri	3.1	0.193548	5.8861	1	0	0	1	0	0	1	1.37097	0	0	1	0	0	i
Goniomma_thoracicum	3.9	0.205128	5.85793	1	0	0	1	0	0	1	1.34615	0	0	1	0	0	i
Leptothorax_acervorum	3.6	0.166667	7.6009	0	0.5	0.5	0	1	0	1	1.15278	0	0	0	1	0	g
Leptothorax_gredleri	3.2	0.15625	3.91202	0	0.5	0.5	0.5	0	0	1	1.1875	0	0	0	1	0	g
Leptothorax_muscorum	2.9	0.551724	5.70378	0	0.5	0.5	0	1	0	1	1.10345	0	0	0	1	0	g
Manica_rubida	7	0.714286	8.16052	0	1	0	1	0.5	0	1	1.60714	1	0	0	0	1	c
Messor_barbarus	7.9	1.03797	8.9872	1	0	0	1	0	0	1	1.67089	0	1	0	0	1	c
Messor_celiae	7.9	1.03797	8.9872	1	0	0	1	0	0	1	1.67089	0	1	0	0	1	c
Messor_bouvieri	6.3	0.714286	8.16052	1	0	0	1	0	0	1	1.86508	1	0	0	0	1	c
Messor_maroccanus	6.3	0.714286	8.16052	1	0	0	1	0	0	1	1.86508	1	0	0	0	1	c
Messor_capitatus	8.4	1.07143	8.29405	1	0	0	1	0	0	1	1.66071	0	1	0	1	0	g
Messor_hispanicus	7.9	1.03797	8.9872	1	0	0	1	0	0	1	1.67089	0	1	0	0	1	c
Messor_lusitanicus	6.5	0.538462	8.16052	1	0	0	1	0	0	1	1.8	1	0	0	0	1	c
Messor_structor	6.8	0.808824	8.29405	1	0	0	0	1	0	1	1.49265	0	1	0	0	1	c
Monomorium_salomonis	3.05	0.360656	8.00637	0.25	0.75	0	0	1	1	1	1.96721	0	1	0	0	1	c
Myrmecina_graminicola	3.05	0.360656	4.60517	0	0.75	0.25	0	0.5	0	1	1.21311	0	0	1	0	0	i
Myrmica_aloba	4.5	0.222222	7.6009	0	0.5	0.5	0.5	0	0	1	1.22222	0	0	0	0	1	c
Myrmica_hellenica			7.37776	0	0.5	0.5	0.5	0.5	0	1		0	0	0	0	1	c
Myrmica_lobulicornis	3.75	0.266667	7.31322	0	0.5	0.5	0.5	1	0	1	1.4	0	0	0	0	1	c
Myrmica_rubra	4	0.25	8.00637	0	0.5	0.5	0.5	1	1	1	1.375	0		0	0	1	c
Myrmica_ruginodis	4.75	0.105263	7.6009	0	0.5	0.5	0.5	0.5	0	1	1.27368	0	0	0	0	1	c
Myrmica_rugulosa	4	0.25	7.6009	0	0.5	0.5	0.5	1	1	1	1.2	0	0	0	0	1	c
Myrmica_sabuleti	4.4	0.136364	8.00637	0	0.5	0.5	0.5	1	0	1	1.25	0	0	0	0	1	c
Myrmica_scabrinodis	4.25	0.235294	7.31322	0	0.5	0.5	0.5	0.5	0	1	1.35294	0	0	0	0	1	c
Myrmica_schencki	4.15	0.506024	6.90776	0	0.5	0.5	0.5	0.5	0	1	1.3253	0	0	0	0	1	c
Myrmica_specioides	5.6	0.178571	7.31322	0	0.5	0.5	0.5	1	0	1	1.08929	0	0	0	0	1	c
Myrmica_spinosior	4.4	0.136364	8.00637	0	0.5	0.5	0.5	1	0	1	1.25	0	0	0	0	1	c
Myrmica_sulcinodis	4.75	0.315789	6.68461	0	0.5	0.5	0.5	0	0.5	1	1.31579	0	0	0	0	1	c
Myrmica_wesmaeli	3.8	0.263158	7.31322	0	0.5	0.5	0.5	1	0	1	1.63158	0	0	0	0	1	c
Oxyopomyrmex_saulcyi	2	0.2	4.60517	1	0	0	1	0	0	1	1.9	0	0	1	0	0	i
Pheidole_pallidula	3.2	1.03125	8.51719	0.25	0.75	0	0.5	0.5	0	1	2.26562	0	1	0	0	1	c
Stenamma_orousetti	3.3	0.181818	4.60517	0	1	0	1	0	0	1	1.30303	0	0	1	0	0	i
Stenamma_westwoodi	3.3	0.181818	4.60517	0	1	0	1	0	0	1	1.30303	0	0	1	0	0	i
Stenamma_petiolatum	4.5	0.133333	4.60517	0	1	0	1	0	0	1	1.06667	0	0	1	0	0	i
Temnothorax_angustulus	2.8	0.214286	3.91202	0	0.5	0.5	1	0	0	1	1.48214	0	0	0	1	0	g
Temnothorax_caesari	2.2	0.181818	4.60517	0	0.5	0.5		0	0	1	1.27273	0	0	0	1	0	g
Temnothorax_clypeatus	3	0.333333	4.60517	0	0.5	0.5	1	0	0	1	1.11667	0	0	0	1	0	g
Temnothorax_crassispinus	2.9	0.413793	4.60517	0	0.5	0.5	0.5	0	0	1	1.41379	0	0	0	1	0	g
Temnothorax_exilis	2.6	0.461538	3.91202	0	0.5	0.5	1	0	0	1	1.51923	0	0	0	1	0	g
Temnothorax_fuentei	4.15	0.0722892	3.91202	0	0.5	0.5	1	0	0	1	1.72289	0	0	0	1	0	g
Temnothorax_gredosi	2.5	0.32	5.01064	0	0.5	0.5	1	0	0	1	1.48	0	0	0	1	0	g
Temnothorax_grouvellei	2.85	0.45614	4.60517	0	0.5	0.5	1	0	0	1	1.7193	0	0	0	1	0	g
Temnothorax_interruptus	2.3	0.521739	5.01064	0	0.5	0.5	0	1	0	1	1.63043	0	0	0	1	0	g
Temnothorax_kraussei	2.8	0.214286	3.91202	0	0.5	0.5	1	0	0	1	1.48214	0	0	0	1	0	g
Temnothorax_lichtensteini	2.6	0.0769231	5.29832	0	0.5	0.5	1	0	0	1	1.5	0	0	0	1	0	g
Temnothorax_luteus	2.4	0.25		0	0.5	0.5	1	0	0	1	1.58333	0	0	0	1	0	g
Temnothorax_niger	2.65	0.339623	5.01064	0	0.5	0.5	1	0	0	1	1.50943	0	0	0	1	0	g
Temnothorax_nigriceps	2.65	0.264151	5.01064	0	0.5	0.5	1	0	0	1	1.58491	0	0	0	1	0	g
Temnothorax_nylanderi	2.65	0.301887	5.70378	0	0.5	0.5	1	0	0	1	1.54717	0	0	0	1	0	g
Temnothorax_pardoi	2.5	0.08	5.01064	0	0.5	0.5	1	0	0	1	1.56	0	0	0	1	0	g
Temnothorax_parvulus	2.45	0.122449	6.39693	0	0.5	0.5	1	0	0	1	1.42857	1	0	0	1	0	g
Temnothorax_rabaudi	2.7	0.222222	5.01064	0	0.5	0.5	1	0	0	1	1.51852	0	0	0	1	0	g
Temnothorax_racovitzai	2.55	0.117647	5.01064	0	0.5	0.5	1	0	0	1	1.56863	0	0	0	1	0	g
Temnothorax_recedens	2.7	0.296296	5.01064	0	0.5	0.5	0	0	0	1	1.38889	1	0	0	1	0	g
Temnothorax_specularis	2.35	0.12766	5.01064	0	0.5	0.5	1	0	0	1	1.70213	0	0	0	1	0	g
Temnothorax_tristis	2.5	0.4	5.01064	0	0.5	0.5	1	1	0	1	1.64	0	0	0	1	0	g
Temnothorax_tuberum	2.85	0.385965	5.29832	0	0.5	0.5	1	0	0.5	1	1.7193	0	0	0	1	0	g
Temnothorax_thyndalei	2.65	0.188679	5.01064	0	0.5	0.5	1	0	0	1	1.75472	0	0	0	1	0	g
Temnothorax_unifasciatus	2.5	0.4	5.78383	0	0.5	0.5	1	0	0	1	1.7	0	0	0	1	0	g
Temnothorax_sp	2.7	0.3	5.11	0	0.5	0.5	1	0	0	1	1.5	0	0	0	1	0	g
Tetramorium_caespitum	2.9	0.413793	9.21034	0.25	0.75	0	1	0	0	1	2.44828	0	1	0	0	1	c
Tetramorium_impurum	2.9	0.413793	9.21034	0.25	0.75	0	1	0	0	1	2.44828	0	1	0	0	1	c
Tetramorium_forte	3.75	0.506667	9.21034	0.25	0.5	0.25	1	0	0	1	1.61333	0	1	0	0	1	c
Tetramorium_hispanicum	3.75	0.506667	9.21034	0.25	0.5	0.25	1	0	0	1	1.61333	0	1	0	0	1	c
Tetramorium_ruginode	3.75	0.506667	9.21034	0.25	0.5	0.25	1	0	0	1	1.61333	0	1	0	0	1	c
Tetramorium_semilaeve	3.6	0.333333	9.21034	0.25	0.75	0	1	1	0	1	1.31944	0	1	0	0	1	c
Tetramorium_punicum	3.6	0.333333	9.21034	0.25	0.75	0	1	1	0	1	1.31944	0	1	0	0	1	c
Hypoponera_eduardi	2.85	0.175439	7.31322	0	1	0	1	1	0	0	1.14035	0	0	0	1	0	g
Hypoponera_punctatissima	3.15	0.15873	5.01064	0	1	0	0.5	1	1	0	1.2381	0	0	0	1	0	g
Ponera_coarctata	2.95	0.305085	4.60517	0	1	0	0	1	0	0	1.28814	0	0	0	1	0	g
Tetraponera_allaborans			6.62007	0	0.75	0.25	0.5	0	0	0			0				NA
Leptanilla_revelieri	1.15	0.0869565	5.70378	0	1	0	0	0	0	1	1.65217	0	0	0	1	0	g

## Sheet: sppxsiteKK
Species	1	2	3	4	5	6	7	8	9	10	11	12	13	14	15	16	17	18	19	20	21	22	23	24	25	26	27	28	29	30	31	32	33	34	35	36	37	38	39	40	41	42	43	44	45	46	47	48	49
Camponotus aethiops		1.0566	2.00597		1.6525	8.64309		1.13725		3.15789		2.05721		0.987945		1.00599	6.72169		1.92239	2.10526	4.33705	4.60437		1.08387	2.11707	3.7139	16.2127	3.45893	16.7899	2.48733	2.57482	4.79262		32.9412	3.73645	1.47692	1.34535	2.05298	3.05455	1.02128	3.03936	1.58882		2.05396		4.11674
Camponotus amaurus
Camponotus cruentatus		1.10873	6.5194	2.01198	121.933	165.403	107.243	74.9357	5.7485	40.1194	1	9.95456	16.4773	34.6993	18.4441	10.5629	52.028	384.076			12.9958	5.11346			77.2526	19.7441		1.43284		83.5933	5.38462			16.6662	16.5668	3.70567	6.01331	68.6563	15.4004	127.772	9.15633	76.3689
Camponotus gestroi
Camponotus fallax																															1.19276						2.66739	1.80463	1.09824	6.43062	10.4099	1.09222
Camponotus figaro
Camponotus foreli		1.174		4.02395																1.02632
Camponotus herculeanus																																															0.53	0.19	0.44
Camponotus lateralis	1.35877				9.75484		1.90489	5.49273			24.7934	14	15.3857	7.08221	3.27173	1.53777	30.9168	5.24173			1.99744		13.2546	1.6525	1.13139		7.46667		15.9955		1.07692		20.5907	21.6354	31.4988	23.673	27.4662	6.27669	9.93667	5.64227	41.1248	21.8777			38.5
Camponotus ligniperdus
Camponotus micans
Camponotus piceus	2.54806	2.28622	7.73413	6.47581	22.6986	3.96258	1.10882	7.27961	9.08178	2.53229	8.31579	6.07045	0.985193	1.93581		1.56655	1.00901	4.44753			4.03478	6.31741	1.08738	7.87141	3.22338	2.36655	3.14019	4.11645	3	1.02327				14.2962		2.95385	4.01996	6.18549	2.75892	3.08908		1.99407				1.94004
Camponotus pilicornis	1.05329	1.10873	1.04013	3.01796	12.1462	16.1403	6.77516	22.1684	5.83688	8.53527	3.12725	5.29453	3.51967	14.0143	1.00599	3.83002	9.27926	14.8674	8.20463	3.66667	9.47611	6.94244	2.89968	3.29431	9.67854	3.04533	2.09346	3.63991	5	7.11916					8.9161	2.33058	5.92283	23.2222	5.31164	29.0323	12.1574	14.2013
Camponotus sylvaticus	12.048	45.9594	71.6131	53.2449	45.076	26.4337	28.8406	26.5766	10.2625	17.0759	2.93206	44.2046	2.44588	46.1515	7.05501	15.4752	39.3503	17.4548	49.4678	44.8947	18.9966	43.3984	2.76137	2.88212	1.06853	3.05148	1.04673	11.4671	1.49852	3.14852		1.07692		4.74446	1.45897							2.14831			0.53	1.83195
Camponotus truncatus														1.10417																			1.50221				4.68533	1.51779	1.19786	1.02128	1.60614
Camponotus vagus
Cataglyphis aenescens
Cataglyphis cursor																				3		26.4727
Cataglyphis floricola
Cataglyphis hispanica
Cataglyphis iberica																			10.0299	10.1053		2.03636								4.19803																0.51
Cataglyphis rosenhaueri
Cataglyphis velox
Formica aquilonia
Formica cinerea
Formica clara
Formica cunicularia																															1.26292													6.07229
Formica decipiens
Formica fusca			8.02388	2.01198	6.04136	18.0871		3.29802		11.5789	48.1262	23.7507	11.6154	20.6089	10.8159	6.60152	7.56153	22.7142	12.8147	11	14.5541	11.7276	7.49719	8.88448	39.8309	15.4033	3.89616	19.7422	5.5	4.56536	3.23077	1.53456	6.75993	36.6003	74.5382	120.447	132.156	83.4559	65.6025	61.5603	59.1254	34.1505		27.0315	2.6	2.93167
Formica gagates				7.04192			1.08039						34.056							3.15789	3.5443	14.2125	435.238	2.16774	246.108	13.1699	594.705	70.4696	1424.37	323.996	93.7982	163.1	1.08387	239.018	315.069	643.034	23.4234	5.06704			63.7495	414.809			3117.5	147.514
Formica gerardi
Formica lemani																																															8.28	1.61	2.18
Formica lugubris																																															32.29	916	1918.3
Formica lusatica
Formica nigricans
Formica polyctena
Formica pratensis
Formica rufa
Formica rufibarbis																										11.2	1.04673				65.6368
Formica sanguinea																															12.1525
Formica subrufa	50.9924	2808.78	92.4975	224.499	278.475	304.19	78.7047	34.971	86.5113	76.5148	16.1404	193.52	29.0139	134.208	155.387	25.7254	88.7928	128.237	715.109	432.895	35.0366	153.546		1.13725		8.14545		236.894		13.1189				1.68929					2.74321	42.1403						10.6677
Formica transkaucasica
Formica truncorum
Formica uralensis
Lasius alienus
Lasius balcanicus
Lasius brunneus
Lasius cinereus
Lasius emarginatus						1.08039					14.5	67.5																			140.093		763.929	1052.21	19.5823	25.5713			71.8717	1.02128	1553.31	1642.67	80.4912	3.4086
Lasius flavus																																															0.08
Lasius fuliginosus
Lasius grandis																																													0.5	52.1864
Lasius lasioides
Lasius myops		1.174		1.00599	1.13725	1.08387			4.01194	1.00299	1			0.987945		1.00599					1.01818				2.38848		1.10488	1.43284	2	1.04951					1.86822	1.47692			1.0466		2.10462	1.12
Lasius niger	69.3498	1950.02		3170.87	1863.38	5539.97		2197.52	6980.7	5903.9	270.136	1555.33		290.817			1.00599	2586.38			95.7091	291.629	2.28922	1387.88		2.53165	2.32606	1.43284	110.333	346.967	16.1538	1.07692	160.413	1169.18	1.69423	1.78028	946.411	853.968	388.794	1640.58	615.652	144.124		497.928
Lasius paralienus
Lasius psammophilus
Plagiolepis pygmaea	17.1883	61.1998	29.8444	72.0987	33.397	87.7358	19.9758	40.7416	28.4951	29.4864	13.1873	18.2299	11.7283	35.1557	20.1312	29.4972	12.9081	34.7648	18.142	7.84211	53.3568	28.7959	46.7802	88.5794	22.1095	19.8285	12.0374	29.6171	17.5923	48.2249		18.5785	11.5423	37.4359	3.70792	19.0304	27.7745	95.4373	18.289	26.1222	20.7378	118.117		7.34313	0.7	3.34976
Plagiolepis schmitzii
Proformica ferreri
Proformica nasuta
Dolichoderus quadripunctatus																															23.9988		8.82428		8.84754						16.9633	12.1081
Linepithema humile				1.00599
Liometopum microcephalum
Tapinoma erraticum																																															0.38	0.19
Tapinoma nigerrimum		9.39203	1.5602	9.38922	1.08039				8.81237	83.8465					1.00599			17.7901			13.5643	11.5787		5.41935	3.24116	18.4744	10.5061	10.1221	6.23961	28.1898		28.4459		3.29412		3.58693		37.8973	1.45897					51.6145		2.74
Tapinoma simrothi
Aphaenogaster dulcineae
Aphaenogaster gibbosa			49.9041	35.0893	3.14781	15.419		1.08387	2.00597	11.4212		34.4915	6.52757	7.39586	1.00599	4.02395	1.0075	17.5783	81.409	47.2421	23.1257	43.5629	1.65968		5.93601	14.92	4.61336	92.9201	1.99407	8.92082		1.19658			22.4187	3.7561			5.09091		28.6426		0.99115	7.70599		1.2243
Aphaenogaster iberica
Aphaenogaster cardenai
Aphaenogaster senilis																							1.08738	41.0664	1.06853	4.07119	1.57009	4.67469										3.11399
Aphaenogaster subterranea			5.01493	2.01198		1.08387	2.29582				17.1725	1.5	10.611	4.29113	5.36527		5.03296					1.06329	4.60133	22.1497		2.0333			5	1.04951	26.2588	4.52182	16.2695	12.7257	36.9034	20.7302	1.58721	8.2582	14.0456	12.766	34.8218	38.4561	0.998516	3.45312	2.45	1.14282
Cardiocondyla batesii
Cardiocondyla mauritanica
Crematogaster auberti
Crematogaster scutellaris	3.78906		14.287		45.5226		30.791	30.7477	127.904	42.1254	24.7223	23.6667	73.4872	2.94045	23.5552	36.159	35.4754	30.0737	1.12836		31.6485		38.2071	13.0065	3.48439	10.147	17.6199		40.2433		23.8904	2.15385	99.4566	105.102	60.7752	16.5325	35.3249	85.0767	66.1121	75.3679	27.638	121.579			35.4	0.822597
Crematogaster sordidula		23.9356	35.6617	9.38922	148.299	44.9446	19.4469	7.04516					32.1803		16.6003	21.6287	273.441	34.5477	10.1591	10.5		1.13725		41.1871										4.48385					28.5091							2.68603
Goniomma baeticum
Goniomma blanci
Goniomma collingwoodi
Goniomma hispanicum					1.2043				2.87425	4.01194
Goniomma kugleri
Goniomma thoracicum
Leptothorax acervorum																																																0.03	0.12
Leptothorax gredleri
Leptothorax muscorum
Manica rubida
Messor barbarus		13.3466	1.50448	670.007															10.3067	31.5789		8.14545
Messor celiae
Messor bouvieri
Messor maroccanus	29.965	21.9538	60.1791	29.1737	115.613			311.071			1	278.83				176.048					2.03636			140.265
Messor capitatus		17.8173		1.00599		1.14092				315.439							15.1351	1.05893	60.0955	437.895	191.392	511.409						146.149		773.487	1.26292							1.35347
Messor hispanicus
Messor lusitanicus
Messor structor		278.943	1.11443										1.97039			16.0958	39.3514		2.06135	3		3.38994								43.0298																16.7266
Monomorium salomonis
Myrmecina graminicola													0.939877														1.04673		2.33037		6.57407								1.33023					1.01205		0.736196
Myrmica aloba
Myrmica hellenica
Myrmica lobulicornis																																															0.04	1.39
Myrmica lonae
Myrmica rubra
Myrmica ruginodis																																															1.32	1.26	0.09
Myrmica rugulosa
Myrmica sabuleti
Myrmica scabrinodis																																															1.73	0.28
Myrmica schenki
Myrmica specioides
Myrmica spinosior
Myrmica sulcinodis
Myrmica wesmaeli																																															1.32	0.79	0.03
Oxyopomyrmex saulcyi
Pheidole pallidula	65.7011	101.061	133.308	349.133	66.5991	46.7445	20.3084	14.3306	15.0786	5.3658	83.052	70.0637	15.9787	156.588	32.8303	95.536	47.0108	96.6278	126.258	112.379	33.1483	92.067	44.6169	86.9528	34.1369	192.014	23.7259	459.811	4.49258	239.025	3.32377	542.173	8.11952	48.6006	33.4057	134.2	5.78178	141.769	34.9051	77.5652	7.74311	95.7718			0.8	5.22329
Stenamma orousetti
Stenamma westwoodi
Stenamma petiolatum
Temnothorax angustulus
Temnothorax caesari
Temnohtorax clypeatus
Temnothorax crassispinus
Temnothorax exilis
Temnothorax fuentei	0.963855	3.33664	1.00299	3.59594																						48.7251
Temnothorax gredosi
Temnothorax grouvellei
Temnothorax interruptus
Temnothorax kraussei			2.00597														1.00901								4.77697				0.998516												1.1474	1.01511
Temnothorax lichtensteini											8.0893	1.00299	12.1459	0.941176			10.5946		1.00299				1.37353		7.50406		8.40291		8.98912		50.9325		2.41874	1.10164	27.7471	1.47692	2.69069				15.173	1.00901
Temnothorax luteus
Temnothorax niger
Temnothorax nigriceps
Temnothorax nylanderi	2.10658		1.00299	1.00599	3.64733	2.16774	2.19868	5.61379	2.00597		10.1457	1.25075	7.79603	0.941176	2.01424		12.4263		1.00299		1.10136	1.13725	4.10629	2.16774	12.2918	1.5242	8.90883	2.34008	11.1899		107.7		8.72801	3.30734	17.6777	3.16061	3.59719	1.71613	5.05376	1.3617	7.76716	6.80435	1	7.08739	6.2
Temnothorax pardoi
Temnothorax parvulus										1.33731
Temnothorax rabaudi	1.15583		1.50448	1.04348	1.08387				1.00299				2.83146	1.10417	1.00599				1.00299						1.1336		1.16303	1.95135	4.66271	0.997033	2.9713		5.70458	2.21053	1.01818	2.32151				1.02128	8.61833	2.15665	0.99115	2.40126	3.4
Temnothorax racovitzai	3.80432	1.11047	2.50746	1.76985	3.62837		1.10882	2.2213	1.86376	1.81618	4.03079	1.37148	4.20605		1.00599		3.52927	1.03246	1.00299		1.25093	1.06329	1.08738	1.11056	3.73504		2.83004		7.9911		4.57797		10.2718	3.11676	10.9553	4.26113	1.89622	2.73347	6.17608	1.54454	27.0388	1.04201	8.94395	6.50523
Temnothorax recedens			1.00299	2.01198							1.00299			0.938547											3.75764				6	4.19803			2.16774
Temnothorax specularis	5.55757	1.97116	9.58408	7.25061	5.17152	3.26947		5.98798	5.01493	5.55999		6.35224				1.50898		1.00599	4.01194	2.05263	2.11704	2.1561		2.89032		1.01818	1.16303	12.1039		1.04951			7.98642				3.18764	1.17647	1.01818	1.02128	4.56913	1.06755				0.503012
Temnothorax tristis
Temnothorax tuberum
Temnothorax thyndalei
Temnothorax unifasciatus
Temnothorax spp
Tetramorium caespitum													12.6289				89.6341	5.16231			10.7688		19.444	8.09073	48.7584	108.035	61.4372	147.403	134.209	58.064	14.3983	13.8312	98.2436	20.5659		62.4878	40.9934	68.3176	111.271	3.06383	52.6593	64.96	13.7001	47.2245	16.9	0.507669	0.23
Tetramorium impurum
Tetramorium forte
Tetramorium hispanicum
Tetramorium ruginode
Tetramorium semilaeve	9.46124	9.92632	12.2308			63.7428			1.50448	3.00896	1.00149	2.00597		1.02136						3.15789	2.04255			2.16774		29.3953		14.5426				2.15385				1.02439	1.67665				2.00597		1.05893	35.439		2.96543
Tetramorium punicum
Hypoponera eduardi
Hypoponera punctatissima
Ponera coarctata
Tetraponera allaborans
Leptanilla revelieri
[truncated: 300 more columns]

## Sheet: community data
Species	1	2	3	4	5	6	7	8	9	10	11	12	13	14	15	16	17	18	19	20	21	22	23	24	25	26	27	28	29	30	31	32	33	34	35	36	37	38	39	40	41	42	43	44	45	46	47	48	49
Camponotus aethiops	0	1	1	0	1	1	0	1	0	1	0	1	0	1	0	1	1	0	1	1	1	1	0	1	1	1	1	1	1	1	1	1	0	1	1	1	1	1	1	1	1	1	0	1	0	1	0	0	0
Camponotus amaurus	0	0	0	0	0	0	0	0	0	0	0	0	0	0	0	0	0	0	0	0	0	0	0	0	0	0	0	0	0	0	0	0	0	0	0	0	0	0	0	0	0	0	0	0	0	0	0	0	0
Camponotus cruentatus	0	1	1	1	1	1	1	1	1	1	1	1	1	1	1	1	1	1	0	0	1	1	0	0	1	1	0	1	0	1	1	0	0	1	1	1	1	1	1	1	1	1	0	0	0	0	0	0	0
Camponotus gestroi	0	0	0	0	0	0	0	0	0	0	0	0	0	0	0	0	0	0	0	0	0	0	0	0	0	0	0	0	0	0	0	0	0	0	0	0	0	0	0	0	0	0	0	0	0	0	0	0	0
Camponotus fallax	0	0	0	0	0	0	0	0	0	0	0	0	0	0	0	0	0	0	0	0	0	0	0	0	0	0	0	0	0	0	1	0	0	0	0	0	1	1	1	1	1	1	0	0	0	0	0	0	0
Camponotus figaro	0	0	0	0	0	0	0	0	0	0	0	0	0	0	0	0	0	0	0	0	0	0	0	0	0	0	0	0	0	0	0	0	0	0	0	0	0	0	0	0	0	0	0	0	0	0	0	0	0
Camponotus foreli	0	1	0	1	0	0	0	0	0	0	0	0	0	0	0	0	0	0	0	1	0	0	0	0	0	0	0	0	0	0	0	0	0	0	0	0	0	0	0	0	0	0	0	0	0	0	0	0	0
Camponotus herculeanus	0	0	0	0	0	0	0	0	0	0	0	0	0	0	0	0	0	0	0	0	0	0	0	0	0	0	0	0	0	0	0	0	0	0	0	0	0	0	0	0	0	0	0	0	0	0	1	1	1
Camponotus lateralis	1	0	0	0	1	0	1	1	0	0	1	1	1	1	1	1	1	1	0	0	1	0	1	1	1	0	1	0	1	0	1	0	1	1	1	1	1	1	1	1	1	1	0	0	1	0	0	0	0
Camponotus ligniperdus	0	0	0	0	0	0	0	0	0	0	0	0	0	0	0	0	0	0	0	0	0	0	0	0	0	0	0	0	0	0	0	0	0	0	0	0	0	0	0	0	0	0	0	0	0	0	0	0	0
Camponotus micans	0	0	0	0	0	0	0	0	0	0	0	0	0	0	0	0	0	0	0	0	0	0	0	0	0	0	0	0	0	0	0	0	0	0	0	0	0	0	0	0	0	0	0	0	0	0	0	0	0
Camponotus piceus	1	1	1	1	1	1	1	1	1	1	1	1	1	1	0	1	1	1	0	0	1	1	1	1	1	1	1	1	1	1	0	0	0	1	0	1	1	1	1	1	0	1	0	0	0	1	0	0	0
Camponotus pilicornis	1	1	1	1	1	1	1	1	1	1	1	1	1	1	1	1	1	1	1	1	1	1	1	1	1	1	1	1	1	1	0	0	0	0	1	1	1	1	1	1	1	1	0	0	0	0	0	0	0
Camponotus sylvaticus	1	1	1	1	1	1	1	1	1	1	1	1	1	1	1	1	1	1	1	1	1	1	1	1	1	1	1	1	1	1	0	1	0	1	1	0	0	0	0	0	0	1	0	0	1	1	0	0	0
Camponotus truncatus	0	0	0	0	0	0	0	0	0	0	0	0	0	1	0	0	0	0	0	0	0	0	0	0	0	0	0	0	0	0	0	0	1	0	0	0	1	1	1	1	1	0	0	0	0	0	0	0	0
Camponotus vagus	0	0	0	0	0	0	0	0	0	0	0	0	0	0	0	0	0	0	0	0	0	0	0	0	0	0	0	0	0	0	0	0	0	0	0	0	0	0	0	0	0	0	0	0	0	0	0	0	0
Cataglyphis aenescens	0	0	0	0	0	0	0	0	0	0	0	0	0	0	0	0	0	0	0	0	0	0	0	0	0	0	0	0	0	0	0	0	0	0	0	0	0	0	0	0	0	0	0	0	0	0	0	0	0
Cataglyphis cursor	0	0	0	0	0	0	0	0	0	0	0	0	0	0	0	0	0	0	0	1	0	1	0	0	0	0	0	0	0	0	0	0	0	0	0	0	0	0	0	0	0	0	0	0	0	0	0	0	0
Cataglyphis floricola	0	0	0	0	0	0	0	0	0	0	0	0	0	0	0	0	0	0	0	0	0	0	0	0	0	0	0	0	0	0	0	0	0	0	0	0	0	0	0	0	0	0	0	0	0	0	0	0	0
Cataglyphis hispanica	0	0	0	0	0	0	0	0	0	0	0	0	0	0	0	0	0	0	0	0	0	0	0	0	0	0	0	0	0	0	0	0	0	0	0	0	0	0	0	0	0	0	0	0	0	0	0	0	0
Cataglyphis iberica	0	0	0	0	0	0	0	0	0	0	0	0	0	0	0	0	0	0	1	1	0	1	0	0	0	0	0	0	0	1	0	0	0	0	0	0	0	0	0	0	0	0	0	0	0	1	0	0	0
Cataglyphis rosenhaueri	0	0	0	0	0	0	0	0	0	0	0	0	0	0	0	0	0	0	0	0	0	0	0	0	0	0	0	0	0	0	0	0	0	0	0	0	0	0	0	0	0	0	0	0	0	0	0	0	0
Cataglyphis velox	0	0	0	0	0	0	0	0	0	0	0	0	0	0	0	0	0	0	0	0	0	0	0	0	0	0	0	0	0	0	0	0	0	0	0	0	0	0	0	0	0	0	0	0	0	0	0	0	0
Formica aquilonia	0	0	0	0	0	0	0	0	0	0	0	0	0	0	0	0	0	0	0	0	0	0	0	0	0	0	0	0	0	0	0	0	0	0	0	0	0	0	0	0	0	0	0	0	0	0	0	0	0
Formica cinerea	0	0	0	0	0	0	0	0	0	0	0	0	0	0	0	0	0	0	0	0	0	0	0	0	0	0	0	0	0	0	0	0	0	0	0	0	0	0	0	0	0	0	0	0	0	0	0	0	0
Formica clara	0	0	0	0	0	0	0	0	0	0	0	0	0	0	0	0	0	0	0	0	0	0	0	0	0	0	0	0	0	0	0	0	0	0	0	0	0	0	0	0	0	0	0	0	0	0	0	0	0
Formica cunicularia	0	0	0	0	0	0	0	0	0	0	0	0	0	0	0	0	0	0	0	0	0	0	0	0	0	0	0	0	0	0	1	0	0	0	0	0	0	0	0	0	0	0	0	1	0	0	0	0	0
Formica decipiens	0	0	0	0	0	0	0	0	0	0	0	0	0	0	0	0	0	0	0	0	0	0	0	0	0	0	0	0	0	0	0	0	0	0	0	0	0	0	0	0	0	0	0	0	0	0	0	0	0
Formica fusca	0	0	1	1	1	1	0	1	0	1	1	1	1	1	1	1	1	1	1	1	1	1	1	1	1	1	1	1	1	1	1	1	1	1	1	1	1	1	1	1	1	1	0	1	1	1	0	0	0
Formica gagates	0	0	0	1	0	0	1	0	0	0	0	0	1	0	0	0	0	0	0	1	1	1	1	1	1	1	1	1	1	1	1	1	1	1	1	1	1	1	0	0	1	1	0	0	1	1	0	0	0
Formica gerardi	0	0	0	0	0	0	0	0	0	0	0	0	0	0	0	0	0	0	0	0	0	0	0	0	0	0	0	0	0	0	0	0	0	0	0	0	0	0	0	0	0	0	0	0	0	0	0	0	0
Formica lemani	0	0	0	0	0	0	0	0	0	0	0	0	0	0	0	0	0	0	0	0	0	0	0	0	0	0	0	0	0	0	0	0	0	0	0	0	0	0	0	0	0	0	0	0	0	0	1	1	1
Formica lugubris	0	0	0	0	0	0	0	0	0	0	0	0	0	0	0	0	0	0	0	0	0	0	0	0	0	0	0	0	0	0	0	0	0	0	0	0	0	0	0	0	0	0	0	0	0	0	1	1	1
Formica lusatica	0	0	0	0	0	0	0	0	0	0	0	0	0	0	0	0	0	0	0	0	0	0	0	0	0	0	0	0	0	0	0	0	0	0	0	0	0	0	0	0	0	0	0	0	0	0	0	0	0
Formica nigricans	0	0	0	0	0	0	0	0	0	0	0	0	0	0	0	0	0	0	0	0	0	0	0	0	0	0	0	0	0	0	0	0	0	0	0	0	0	0	0	0	0	0	0	0	0	0	0	0	0
Formica polyctena	0	0	0	0	0	0	0	0	0	0	0	0	0	0	0	0	0	0	0	0	0	0	0	0	0	0	0	0	0	0	0	0	0	0	0	0	0	0	0	0	0	0	0	0	0	0	0	0	0
Formica pratensis	0	0	0	0	0	0	0	0	0	0	0	0	0	0	0	0	0	0	0	0	0	0	0	0	0	0	0	0	0	0	0	0	0	0	0	0	0	0	0	0	0	0	0	0	0	0	0	0	0
Formica rufa	0	0	0	0	0	0	0	0	0	0	0	0	0	0	0	0	0	0	0	0	0	0	0	0	0	0	0	0	0	0	0	0	0	0	0	0	0	0	0	0	0	0	0	0	0	0	0	0	0
Formica rufibarbis	0	0	0	0	0	0	0	0	0	0	0	0	0	0	0	0	0	0	0	0	0	0	0	0	0	1	1	0	0	0	1	0	0	0	0	0	0	0	0	0	0	0	0	0	0	0	0	0	0
Formica sanguinea	0	0	0	0	0	0	0	0	0	0	0	0	0	0	0	0	0	0	0	0	0	0	0	0	0	0	0	0	0	0	1	0	0	0	0	0	0	0	0	0	0	0	0	0	0	0	0	0	0
Formica subrufa	1	1	1	1	1	1	1	1	1	1	1	1	1	1	1	1	1	1	1	1	1	1	0	1	0	1	0	1	0	1	0	0	0	1	0	0	0	0	1	1	0	0	0	0	0	1	0	0	0
Formica transkaucasica	0	0	0	0	0	0	0	0	0	0	0	0	0	0	0	0	0	0	0	0	0	0	0	0	0	0	0	0	0	0	0	0	0	0	0	0	0	0	0	0	0	0	0	0	0	0	0	0	0
Formica truncorum	0	0	0	0	0	0	0	0	0	0	0	0	0	0	0	0	0	0	0	0	0	0	0	0	0	0	0	0	0	0	0	0	0	0	0	0	0	0	0	0	0	0	0	0	0	0	0	0	0
Formica uralensis	0	0	0	0	0	0	0	0	0	0	0	0	0	0	0	0	0	0	0	0	0	0	0	0	0	0	0	0	0	0	0	0	0	0	0	0	0	0	0	0	0	0	0	0	0	0	0	0	0
Lasius alienus	0	0	0	0	0	0	0	0	0	0	0	0	0	0	0	0	0	0	0	0	0	0	0	0	0	0	0	0	0	0	0	0	0	0	0	0	0	0	0	0	0	0	0	0	0	0	0	0	0
Lasius balcanicus	0	0	0	0	0	0	0	0	0	0	0	0	0	0	0	0	0	0	0	0	0	0	0	0	0	0	0	0	0	0	0	0	0	0	0	0	0	0	0	0	0	0	0	0	0	0	0	0	0
Lasius brunneus	0	0	0	0	0	0	0	0	0	0	0	0	0	0	0	0	0	0	0	0	0	0	0	0	0	0	0	0	0	0	0	0	0	0	0	0	0	0	0	0	0	0	0	0	0	0	0	0	0
Lasius cinereus	0	0	0	0	0	0	0	0	0	0	0	0	0	0	0	0	0	0	0	0	0	0	0	0	0	0	0	0	0	0	0	0	0	0	0	0	0	0	0	0	0	0	0	0	0	0	0	0	0
Lasius emarginatus	0	0	0	0	0	1	0	0	0	0	1	1	0	0	0	0	0	0	0	0	0	0	0	0	0	0	0	0	0	0	1	0	1	1	1	1	0	0	1	1	1	1	1	1	0	0	0	0	0
Lasius flavus	0	0	0	0	0	0	0	0	0	0	0	0	0	0	0	0	0	0	0	0	0	0	0	0	0	0	0	0	0	0	0	0	0	0	0	0	0	0	0	0	0	0	0	0	0	0	1	0	0
Lasius fuliginosus	0	0	0	0	0	0	0	0	0	0	0	0	0	0	0	0	0	0	0	0	0	0	0	0	0	0	0	0	0	0	0	0	0	0	0	0	0	0	0	0	0	0	0	0	0	0	0	0	0
Lasius grandis	0	0	0	0	0	0	0	0	0	0	0	0	0	0	0	0	0	0	0	0	0	0	0	0	0	0	0	0	0	0	0	0	0	0	0	0	0	0	0	0	0	0	0	0	1	1	0	0	0
Lasius lasioides	0	0	0	0	0	0	0	0	0	0	0	0	0	0	0	0	0	0	0	0	0	0	0	0	0	0	0	0	0	0	0	0	0	0	0	0	0	0	0	0	0	0	0	0	0	0	0	0	0
Lasius myops	0	1	0	1	1	1	0	0	1	1	1	0	0	1	0	1	0	0	0	0	1	0	0	0	1	0	1	1	1	1	0	0	0	0	1	1	0	0	1	0	1	1	0	0	0	0	0	0	0
Lasius niger	1	1	0	1	1	1	0	1	1	1	1	1	0	1	0	0	1	1	0	0	1	1	1	1	0	1	1	1	1	1	1	1	1	1	1	1	1	1	1	1	1	1	0	1	0	0	0	0	0
Lasius paralienus	0	0	0	0	0	0	0	0	0	0	0	0	0	0	0	0	0	0	0	0	0	0	0	0	0	0	0	0	0	0	0	0	0	0	0	0	0	0	0	0	0	0	0	0	0	0	0	0	0
Lasius psammophilus	0	0	0	0	0	0	0	0	0	0	0	0	0	0	0	0	0	0	0	0	0	0	0	0	0	0	0	0	0	0	0	0	0	0	0	0	0	0	0	0	0	0	0	0	0	0	0	0	0
Plagiolepis pygmaea	1	1	1	1	1	1	1	1	1	1	1	1	1	1	1	1	1	1	1	1	1	1	1	1	1	1	1	1	1	1	0	1	1	1	1	1	1	1	1	1	1	1	0	1	1	1	0	0	0
Plagiolepis schmitzii	0	0	0	0	0	0	0	0	0	0	0	0	0	0	0	0	0	0	0	0	0	0	0	0	0	0	0	0	0	0	0	0	0	0	0	0	0	0	0	0	0	0	0	0	0	0	0	0	0
Proformica ferreri	0	0	0	0	0	0	0	0	0	0	0	0	0	0	0	0	0	0	0	0	0	0	0	0	0	0	0	0	0	0	0	0	0	0	0	0	0	0	0	0	0	0	0	0	0	0	0	0	0
Proformica nasuta	0	0	0	0	0	0	0	0	0	0	0	0	0	0	0	0	0	0	0	0	0	0	0	0	0	0	0	0	0	0	0	0	0	0	0	0	0	0	0	0	0	0	0	0	0	0	0	0	0
Dolichoderus quadripunctatus	0	0	0	0	0	0	0	0	0	0	0	0	0	0	0	0	0	0	0	0	0	0	0	0	0	0	0	0	0	0	1	0	1	0	1	0	0	0	0	0	1	1	0	0	0	0	0	0	0
Linepithema humile	0	0	0	1	0	0	0	0	0	0	0	0	0	0	0	0	0	0	0	0	0	0	0	0	0	0	0	0	0	0	0	0	0	0	0	0	0	0	0	0	0	0	0	0	0	0	0	0	0
Liometopum microcephalum	0	0	0	0	0	0	0	0	0	0	0	0	0	0	0	0	0	0	0	0	0	0	0	0	0	0	0	0	0	0	0	0	0	0	0	0	0	0	0	0	0	0	0	0	0	0	0	0	0
Tapinoma erraticum	0	0	0	0	0	0	0	0	0	0	0	0	0	0	0	0	0	0	0	0	0	0	0	0	0	0	0	0	0	0	0	0	0	0	0	0	0	0	0	0	0	0	0	0	0	0	1	1	0
Tapinoma nigerrimum	0	1	1	1	1	0	0	0	1	1	0	0	0	0	1	0	0	1	0	0	1	1	0	1	1	1	1	1	1	1	0	1	0	1	0	1	0	1	1	0	0	0	0	1	0	1	0	0	0
Tapinoma simrothi	0	0	0	0	0	0	0	0	0	0	0	0	0	0	0	0	0	0	0	0	0	0	0	0	0	0	0	0	0	0	0	0	0	0	0	0	0	0	0	0	0	0	0	0	0	0	0	0	0
Aphaenogaster dulcineae	0	0	0	0	0	0	0	0	0	0	0	0	0	0	0	0	0	0	0	0	0	0	0	0	0	0	0	0	0	0	0	0	0	0	0	0	0	0	0	0	0	0	0	0	0	0	0	0	0
Aphaenogaster gibbosa	0	0	1	1	1	1	0	1	1	1	0	1	1	1	1	1	1	1	1	1	1	1	1	0	1	1	1	1	1	1	0	1	0	0	1	1	0	0	1	0	1	0	1	1	0	1	0	0	0
Aphaenogaster iberica	0	0	0	0	0	0	0	0	0	0	0	0	0	0	0	0	0	0	0	0	0	0	0	0	0	0	0	0	0	0	0	0	0	0	0	0	0	0	0	0	0	0	0	0	0	0	0	0	0
Aphaenogaster cardenai	0	0	0	0	0	0	0	0	0	0	0	0	0	0	0	0	0	0	0	0	0	0	0	0	0	0	0	0	0	0	0	0	0	0	0	0	0	0	0	0	0	0	0	0	0	0	0	0	0
Aphaenogaster senilis	0	0	0	0	0	0	0	0	0	0	0	0	0	0	0	0	0	0	0	0	0	0	1	1	1	1	1	1	0	0	0	0	0	0	0	0	0	1	0	0	0	0	0	0	0	0	0	0	0
Aphaenogaster subterranea	0	0	1	1	0	1	1	0	0	0	1	1	1	1	1	0	1	0	0	0	0	1	1	1	0	1	0	0	1	1	1	1	1	1	1	1	1	1	1	1	1	1	1	1	1	1	0	0	0
Cardiocondyla batesii	0	0	0	0	0	0	0	0	0	0	0	0	0	0	0	0	0	0	0	0	0	0	0	0	0	0	0	0	0	0	0	0	0	0	0	0	0	0	0	0	0	0	0	0	0	0	0	0	0
Cardiocondyla mauritanica	0	0	0	0	0	0	0	0	0	0	0	0	0	0	0	0	0	0	0	0	0	0	0	0	0	0	0	0	0	0	0	0	0	0	0	0	0	0	0	0	0	0	0	0	0	0	0	0	0
Crematogaster auberti	0	0	0	0	0	0	0	0	0	0	0	0	0	0	0	0	0	0	0	0	0	0	0	0	0	0	0	0	0	0	0	0	0	0	0	0	0	0	0	0	0	0	0	0	0	0	0	0	0
Crematogaster scutellaris	1	0	1	0	1	0	1	1	1	1	1	1	1	1	1	1	1	1	1	0	1	0	1	1	1	1	1	0	1	0	1	1	1	1	1	1	1	1	1	1	1	1	0	0	1	1	0	0	0
Crematogaster sordidula	0	1	1	1	1	1	1	1	0	0	0	0	1	0	1	1	1	1	1	1	0	1	0	1	0	0	0	0	0	0	0	0	0	1	0	0	0	0	1	0	0	0	0	0	0	1	0	0	0
Goniomma baeticum	0	0	0	0	0	0	0	0	0	0	0	0	0	0	0	0	0	0	0	0	0	0	0	0	0	0	0	0	0	0	0	0	0	0	0	0	0	0	0	0	0	0	0	0	0	0	0	0	0
Goniomma blanci	0	0	0	0	0	0	0	0	0	0	0	0	0	0	0	0	0	0	0	0	0	0	0	0	0	0	0	0	0	0	0	0	0	0	0	0	0	0	0	0	0	0	0	0	0	0	0	0	0
Goniomma collingwoodi	0	0	0	0	0	0	0	0	0	0	0	0	0	0	0	0	0	0	0	0	0	0	0	0	0	0	0	0	0	0	0	0	0	0	0	0	0	0	0	0	0	0	0	0	0	0	0	0	0
Goniomma hispanicum	0	0	0	0	1	0	0	0	1	1	0	0	0	0	0	0	0	0	0	0	0	0	0	0	0	0	0	0	0	0	0	0	0	0	0	0	0	0	0	0	0	0	0	0	0	0	0	0	0
Goniomma kugleri	0	0	0	0	0	0	0	0	0	0	0	0	0	0	0	0	0	0	0	0	0	0	0	0	0	0	0	0	0	0	0	0	0	0	0	0	0	0	0	0	0	0	0	0	0	0	0	0	0
Goniomma thoracicum	0	0	0	0	0	0	0	0	0	0	0	0	0	0	0	0	0	0	0	0	0	0	0	0	0	0	0	0	0	0	0	0	0	0	0	0	0	0	0	0	0	0	0	0	0	0	0	0	0
Leptothorax acervorum	0	0	0	0	0	0	0	0	0	0	0	0	0	0	0	0	0	0	0	0	0	0	0	0	0	0	0	0	0	0	0	0	0	0	0	0	0	0	0	0	0	0	0	0	0	0	0	1	1
Leptothorax gredleri	0	0	0	0	0	0	0	0	0	0	0	0	0	0	0	0	0	0	0	0	0	0	0	0	0	0	0	0	0	0	0	0	0	0	0	0	0	0	0	0	0	0	0	0	0	0	0	0	0
Leptothorax muscorum	0	0	0	0	0	0	0	0	0	0	0	0	0	0	0	0	0	0	0	0	0	0	0	0	0	0	0	0	0	0	0	0	0	0	0	0	0	0	0	0	0	0	0	0	0	0	0	0	0
Manica rubida	0	0	0	0	0	0	0	0	0	0	0	0	0	0	0	0	0	0	0	0	0	0	0	0	0	0	0	0	0	0	0	0	0	0	0	0	0	0	0	0	0	0	0	0	0	0	0	0	0
Messor barbarus	0	1	1	1	0	0	0	0	0	0	0	0	0	0	0	0	0	0	1	1	0	1	0	0	0	0	0	0	0	0	0	0	0	0	0	0	0	0	0	0	0	0	0	0	0	0	0	0	0
Messor celiae	0	0	0	0	0	0	0	0	0	0	0	0	0	0	0	0	0	0	0	0	0	0	0	0	0	0	0	0	0	0	0	0	0	0	0	0	0	0	0	0	0	0	0	0	0	0	0	0	0
Messor bouvieri	0	0	0	0	0	0	0	0	0	0	0	0	0	0	0	0	0	0	0	0	0	0	0	0	0	0	0	0	0	0	0	0	0	0	0	0	0	0	0	0	0	0	0	0	0	0	0	0	0
Messor maroccanus	1	1	1	1	1	0	0	1	0	0	1	1	0	0	0	1	0	0	0	0	1	0	0	1	0	0	0	0	0	0	0	0	0	0	0	0	0	0	0	0	0	0	0	0	0	0	0	0	0
Messor capitatus	0	1	0	1	0	1	0	0	0	1	0	0	0	0	0	0	1	1	1	1	1	1	0	0	0	0	0	1	0	1	1	0	0	0	0	0	0	1	0	0	0	0	0	0	0	0	0	0	0
Messor hispanicus	0	0	0	0	0	0	0	0	0	0	0	0	0	0	0	0	0	0	0	0	0	0	0	0	0	0	0	0	0	0	0	0	0	0	0	0	0	0	0	0	0	0	0	0	0	0	0	0	0
Messor lusitanicus	0	0	0	0	0	0	0	0	0	0	0	0	0	0	0	0	0	0	0	0	0	0	0	0	0	0	0	0	0	0	0	0	0	0	0	0	0	0	0	0	0	0	0	0	0	0	0	0	0
Messor structor	0	1	1	0	0	0	0	0	0	0	0	0	1	0	0	1	1	0	1	1	0	1	0	0	0	0	0	0	0	1	0	0	0	0	0	0	0	0	0	0	0	0	0	0	0	1	0	0	0
Monomorium salomonis	0	0	0	0	0	0	0	0	0	0	0	0	0	0	0	0	0	0	0	0	0	0	0	0	0	0	0	0	0	0	0	0	0	0	0	0	0	0	0	0	0	0	0	0	0	0	0	0	0
Myrmecina graminicola	0	0	0	0	0	0	0	0	0	0	0	0	1	0	0	0	0	0	0	0	0	0	0	0	0	0	1	0	1	0	1	0	0	0	0	0	0	0	1	0	0	0	0	1	0	1	0	0	0
Myrmica aloba	0	0	0	0	0	0	0	0	0	0	0	0	0	0	0	0	0	0	0	0	0	0	0	0	0	0	0	0	0	0	0	0	0	0	0	0	0	0	0	0	0	0	0	0	0	0	0	0	0
Myrmica hellenica	0	0	0	0	0	0	0	0	0	0	0	0	0	0	0	0	0	0	0	0	0	0	0	0	0	0	0	0	0	0	0	0	0	0	0	0	0	0	0	0	0	0	0	0	0	0	0	0	0
Myrmica lobulicornis	0	0	0	0	0	0	0	0	0	0	0	0	0	0	0	0	0	0	0	0	0	0	0	0	0	0	0	0	0	0	0	0	0	0	0	0	0	0	0	0	0	0	0	0	0	0	1	1	0
Myrmica lonae	0	0	0	0	0	0	0	0	0	0	0	0	0	0	0	0	0	0	0	0	0	0	0	0	0	0	0	0	0	0	0	0	0	0	0	0	0	0	0	0	0	0	0	0	0	0	0	0	0
Myrmica rubra	0	0	0	0	0	0	0	0	0	0	0	0	0	0	0	0	0	0	0	0	0	0	0	0	0	0	0	0	0	0	0	0	0	0	0	0	0	0	0	0	0	0	0	0	0	0	0	0	0
Myrmica ruginodis	0	0	0	0	0	0	0	0	0	0	0	0	0	0	0	0	0	0	0	0	0	0	0	0	0	0	0	0	0	0	0	0	0	0	0	0	0	0	0	0	0	0	0	0	0	0	1	1	1
Myrmica rugulosa	0	0	0	0	0	0	0	0	0	0	0	0	0	0	0	0	0	0	0	0	0	0	0	0	0	0	0	0	0	0	0	0	0	0	0	0	0	0	0	0	0	0	0	0	0	0	0	0	0
Myrmica sabuleti	0	0	0	0	0	0	0	0	0	0	0	0	0	0	0	0	0	0	0	0	0	0	0	0	0	0	0	0	0	0	0	0	0	0	0	0	0	0	0	0	0	0	0	0	0	0	0	0	0
Myrmica scabrinodis	0	0	0	0	0	0	0	0	0	0	0	0	0	0	0	0	0	0	0	0	0	0	0	0	0	0	0	0	0	0	0	0	0	0	0	0	0	0	0	0	0	0	0	0	0	0	1	1	0
Myrmica schencki	0	0	0	0	0	0	0	0	0	0	0	0	0	0	0	0	0	0	0	0	0	0	0	0	0	0	0	0	0	0	0	0	0	0	0	0	0	0	0	0	0	0	0	0	0	0	0	0	0
Myrmica specioides	0	0	0	0	0	0	0	0	0	0	0	0	0	0	0	0	0	0	0	0	0	0	0	0	0	0	0	0	0	0	0	0	0	0	0	0	0	0	0	0	0	0	0	0	0	0	0	0	0
Myrmica spinosior	0	0	0	0	0	0	0	0	0	0	0	0	0	0	0	0	0	0	0	0	0	0	0	0	0	0	0	0	0	0	0	0	0	0	0	0	0	0	0	0	0	0	0	0	0	0	0	0	0
Myrmica sulcinodis	0	0	0	0	0	0	0	0	0	0	0	0	0	0	0	0	0	0	0	0	0	0	0	0	0	0	0	0	0	0	0	0	0	0	0	0	0	0	0	0	0	0	0	0	0	0	0	0	0
Myrmica wesmaeli	0	0	0	0	0	0	0	0	0	0	0	0	0	0	0	0	0	0	0	0	0	0	0	0	0	0	0	0	0	0	0	0	0	0	0	0	0	0	0	0	0	0	0	0	0	0	1	1	1
Oxyopomyrmex saulcyi	0	0	0	0	0	0	0	0	0	0	0	0	0	0	0	0	0	0	0	0	0	0	0	0	0	0	0	0	0	0	0	0	0	0	0	0	0	0	0	0	0	0	0	0	0	0	0	0	0
Pheidole pallidula	1	1	1	1	1	1	1	1	1	1	1	1	1	1	1	1	1	1	1	1	1	1	1	1	1	1	1	1	1	1	1	1	1	1	1	1	1	1	1	1	1	1	0	0	1	1	0	0	0
Stenamma orousetti	0	0	0	0	0	0	0	0	0	0	0	0	0	0	0	0	0	0	0	0	0	0	0	0	0	0	0	0	0	0	0	0	0	0	0	0	0	0	0	0	0	0	0	0	0	0	0	0	0
Stenamma westwoodi	0	0	0	0	0	0	0	0	0	0	0	0	0	0	0	0	0	0	0	0	0	0	0	0	0	0	0	0	0	0	0	0	0	0	0	0	0	0	0	0	0	0	0	0	0	0	0	0	0
Stenamma petiolatum	0	0	0	0	0	0	0	0	0	0	0	0	0	0	0	0	0	0	0	0	0	0	0	0	0	0	0	0	0	0	0	0	0	0	0	0	0	0	0	0	0	0	0	0	0	0	0	0	0
Temnothorax angustulus	0	0	0	0	0	0	0	0	0	0	0	0	0	0	0	0	0	0	0	0	0	0	0	0	0	0	0	0	0	0	0	0	0	0	0	0	0	0	0	0	0	0	0	0	0	0	0	0	0
Temnothorax caesari	0	0	0	0	0	0	0	0	0	0	0	0	0	0	0	0	0	0	0	0	0	0	0	0	0	0	0	0	0	0	0	0	0	0	0	0	0	0	0	0	0	0	0	0	0	0	0	0	0
Temnothorax clypeatus	0	0	0	0	0	0	0	0	0	0	0	0	0	0	0	0	0	0	0	0	0	0	0	0	0	0	0	0	0	0	0	0	0	0	0	0	0	0	0	0	0	0	0	0	0	0	0	0	0
Temnothorax crassispinus	0	0	0	0	0	0	0	0	0	0	0	0	0	0	0	0	0	0	0	0	0	0	0	0	0	0	0	0	0	0	0	0	0	0	0	0	0	0	0	0	0	0	0	0	0	0	0	0	0
Temnothorax exilis	0	0	0	0	0	0	0	0	0	0	0	0	0	0	0	0	0	0	0	0	0	0	0	0	0	0	0	0	0	0	0	0	0	0	0	0	0	0	0	0	0	0	0	0	0	0	0	0	0
Temnothorax fuentei	1	1	1	1	0	0	0	0	0	0	0	0	0	0	0	0	0	0	0	0	0	0	0	0	0	1	0	0	0	0	0	0	0	0	0	0	0	0	0	0	0	0	0	0	0	0	0	0	0
Temnothorax gredosi	0	0	0	0	0	0	0	0	0	0	0	0	0	0	0	0	0	0	0	0	0	0	0	0	0	0	0	0	0	0	0	0	0	0	0	0	0	0	0	0	0	0	0	0	0	0	0	0	0
Temnothorax grouvellei	0	0	0	0	0	0	0	0	0	0	0	0	0	0	0	0	0	0	0	0	0	0	0	0	0	0	0	0	0	0	0	0	0	0	0	0	0	0	0	0	0	0	0	0	0	0	0	0	0
Temnothorax interruptus	0	0	0	0	0	0	0	0	0	0	0	0	0	0	0	0	0	0	0	0	0	0	0	0	0	0	0	0	0	0	0	0	0	0	0	0	0	0	0	0	0	0	0	0	0	0	0	0	0
Temnothorax kraussei	0	0	1	0	0	0	0	0	0	0	0	0	0	0	0	0	1	0	0	0	0	0	0	0	1	0	0	0	1	0	0	0	0	0	0	0	0	0	0	0	1	1	0	0	0	0	0	0	0
Temnothorax lichtensteini	0	0	0	0	0	0	0	0	0	0	1	1	1	1	0	0	1	0	1	0	0	0	1	0	1	0	1	0	1	0	1	0	1	1	1	1	1	0	0	0	1	1	0	0	0	0	0	0	0
Temnothorax luteus	0	0	0	0	0	0	0	0	0	0	0	0	0	0	0	0	0	0	0	0	0	0	0	0	0	0	0	0	0	0	0	0	0	0	0	0	0	0	0	0	0	0	0	0	0	0	0	0	0
Temnothorax niger	0	0	0	0	0	0	0	0	0	0	0	0	0	0	0	0	0	0	0	0	0	0	0	0	0	0	0	0	0	0	0	0	0	0	0	0	0	0	0	0	0	0	0	0	0	0	0	0	0
Temnothorax nigriceps	0	0	0	0	0	0	0	0	0	0	0	0	0	0	0	0	0	0	0	0	0	0	0	0	0	0	0	0	0	0	0	0	0	0	0	0	0	0	0	0	0	0	0	0	0	0	0	0	0
Temnothorax nylanderi	1	0	1	1	1	1	1	1	1	0	1	1	1	1	1	0	1	0	1	0	1	1	1	1	1	1	1	1	1	0	1	0	1	1	1	1	1	1	1	1	1	1	1	1	1	0	0	0	0
Temnothorax pardoi	0	0	0	0	0	0	0	0	0	0	0	0	0	0	0	0	0	0	0	0	0	0	0	0	0	0	0	0	0	0	0	0	0	0	0	0	0	0	0	0	0	0	0	0	0	0	0	0	0
Temnothorax parvulus	0	0	0	0	0	0	0	0	0	1	0	0	0	0	0	0	0	0	0	0	0	0	0	0	0	0	0	0	0	0	0	0	0	0	0	0	0	0	0	0	0	0	0	0	0	0	0	0	0
Temnothorax rabaudi	1	0	1	1	1	0	0	0	1	0	0	0	1	1	1	0	0	0	1	0	0	0	0	0	1	0	1	1	1	1	1	0	1	1	1	1	0	0	0	1	1	1	1	1	1	0	0	0	0
Temnothorax racovitzai	1	1	1	1	1	0	1	1	1	1	1	1	1	0	1	0	1	1	1	0	1	1	1	1	1	0	1	0	1	0	1	0	1	1	1	1	1	1	1	1	1	1	1	1	0	0	0	0	0
Temnothorax recedens	0	0	1	1	0	0	0	0	0	0	1	0	0	1	0	0	0	0	0	0	0	0	0	0	1	0	0	0	1	1	0	0	1	0	0	0	0	0	0	0	0	0	0	0	0	0	0	0	0
Temnothorax specularis	1	1	1	1	1	1	0	1	1	1	0	1	0	0	0	1	0	1	1	1	1	1	0	1	0	1	1	1	0	1	0	0	1	0	0	0	1	1	1	1	1	1	0	0	0	1	0	0	0
Temnothorax tristis	0	0	0	0	0	0	0	0	0	0	0	0	0	0	0	0	0	0	0	0	0	0	0	0	0	0	0	0	0	0	0	0	0	0	0	0	0	0	0	0	0	0	0	0	0	0	0	0	0
Temnothorax tuberum	0	0	0	0	0	0	0	0	0	0	0	0	0	0	0	0	0	0	0	0	0	0	0	0	0	0	0	0	0	0	0	0	0	0	0	0	0	0	0	0	0	0	0	0	0	0	0	0	0
Temnothorax thyndalei	0	0	0	0	0	0	0	0	0	0	0	0	0	0	0	0	0	0	0	0	0	0	0	0	0	0	0	0	0	0	0	0	0	0	0	0	0	0	0	0	0	0	0	0	0	0	0	0	0
Temnothorax unifasciatus	0	0	0	0	0	0	0	0	0	0	0	0	0	0	0	0	0	0	0	0	0	0	0	0	0	0	0	0	0	0	0	0	0	0	0	0	0	0	0	0	0	0	0	0	0	0	0	0	0
Temnothorax sp	0	0	0	0	0	0	0	0	0	0	0	0	0	0	0	0	0	0	0	0	0	0	0	0	0	0	0	0	0	0	0	0	0	0	0	0	0	0	0	0	0	0	0	0	0	0	0	0	0
Tetramorium caespitum	0	0	0	0	0	0	0	0	0	0	0	0	1	0	0	0	1	1	0	0	1	0	1	1	1	1	1	1	1	1	1	1	1	1	0	1	1	1	1	1	1	1	1	1	1	1	1	0	0
Tetramorium impurum	0	0	0	0	0	0	0	0	0	0	0	0	0	0	0	0	0	0	0	0	0	0	0	0	0	0	0	0	0	0	0	0	0	0	0	0	0	0	0	0	0	0	0	0	0	0	0	0	0
Tetramorium forte	0	0	0	0	0	0	0	0	0	0	0	0	0	0	0	0	0	0	0	0	0	0	0	0	0	0	0	0	0	0	0	0	0	0	0	0	0	0	0	0	0	0	0	0	0	0	0	0	0
Tetramorium hispanicum	0	0	0	0	0	0	0	0	0	0	0	0	0	0	0	0	0	0	0	0	0	0	0	0	0	0	0	0	0	0	0	0	0	0	0	0	0	0	0	0	0	0	0	0	0	0	0	0	0
Tetramorium ruginode	0	0	0	0	0	0	0	0	0	0	0	0	0	0	0	0	0	0	0	0	0	0	0	0	0	0	0	0	0	0	0	0	0	0	0	0	0	0	0	0	0	0	0	0	0	0	0	0	0
Tetramorium semilaeve	1	1	1	0	0	1	0	0	1	1	1	1	0	1	0	0	0	0	0	1	1	0	0	1	0	1	0	1	0	0	0	1	0	0	0	1	1	0	0	0	1	0	1	1	0	1	0	0	0
Tetramorium punicum	0	0	0	0	0	0	0	0	0	0	0	0	0	0	0	0	0	0	0	0	0	0	0	0	0	0	0	0	0	0	0	0	0	0	0	0	0	0	0	0	0	0	0	0	0	0	0	0	0
Hypoponera eduardi	0	0	0	0	0	0	0	0	0	0	0	0	0	0	0	0	0	0	0	0	0	0	0	0	0	0	0	0	0	0	0	0	0	0	0	0	0	0	0	0	0	0	0	0	0	0	0	0	0
Hypoponera punctatissima	0	0	0	0	0	0	0	0	0	0	0	0	0	0	0	0	0	0	0	0	0	0	0	0	0	0	0	0	0	0	0	0	0	0	0	0	0	0	0	0	0	0	0	0	0	0	0	0	0
Ponera coarctata	0	0	0	0	0	0	0	0	0	0	0	0	0	0	0	0	0	0	0	0	0	0	0	0	0	0	0	0	0	0	0	0	0	0	0	0	0	0	0	0	0	0	0	0	0	0	0	0	0
Tetraponera allaborans	0	0	0	0	0	0	0	0	0	0	0	0	0	0	0	0	0	0	0	0	0	0	0	0	0	0	0	0	0	0	0	0	0	0	0	0	0	0	0	0	0	0	0	0	0	0	0	0	0
Leptanilla revelieri	0	0	0	0	0	0	0	0	0	0	0	0	0	0	0	0	0	0	0	0	0	0	0	0	0	0	0	0	0	0	0	0	0	0	0	0	0	0	0	0	0	0	0	0	0	0	0	0	0
[truncated: 300 more columns]

## Sheet: environmental data
Locality_code	Longitude	Latitude	MAT	TS	TA	AP	Idiv	Idist
1	3.13333	42.4	155	5294	236	586	0.826685	3.00548
2	3.13333	42.4	155	5294	236	586	0.82667	3.00574
3	1.9	41.5667	141	5430	225	665	0.314331	2.32064
4	1.9	41.5667	141	5430	225	665	0.314328	2.32045
5	0.833333	41.05	143	5606	248	610	0.170268	0
6	0.833334	41.05	143	5606	248	610	0.170274	0
7	1.83333	41.3	157	5227	216	626	0.594578	0
8	1.83333	41.3	157	5227	216	626	0.594581	0
9	0.3	40.6667	141	5576	250	564	0.297175	0
10	0.300001	40.6667	141	5576	250	564	0.297179	0
11	2.21667	41.5	147	5320	220	692	0.0552577	13.8809
12	2.21667	41.5	147	5320	220	692	0.0552582	13.881
13	2.26667	41.7	142	5458	226	735	0.532824	14.1608
14	2.26667	41.7	142	5458	226	735	0.532832	14.1602
15	1.46667	41.2333	150	5264	219	607	0.589992	2.7847
16	1.46667	41.2333	150	5264	219	607	0.589995	2.78497
17	0.783333	41.2333	143	5870	262	562	0.308	0
18	0.783334	41.2333	143	5870	262	562	0.308001	0
19	0.366667	41.1833	151	5967	275	465	0.193999	0
20	0.366668	41.1833	151	5967	275	465	0.193997	0
21	1.7	41.7667	130	5671	238	687	0.202264	0
22	1.7	41.7667	130	5671	238	687	0.202264	0
23	2.05	41.5167	154	5383	222	628	0.259305	38.51
24	2.05	41.5167	154	5383	222	628	0.259313	38.5096
25	1.66667	41.8	121	5651	237	734	0.361938	0
26	1.66667	41.8	121	5651	237	734	0.361943	0
27	1.76667	41.9333	125	5670	240	717	0.171239	0
28	1.76667	41.9333	125	5670	240	717	0.171237	0
29	2	41.9667	126	5582	235	717	0.385561	0
30	2	41.9667	126	5582	235	717	0.38555	0
31	1.95	42.05	122	5641	237	732	0.137316	0
32	1.95	42.05	122	5641	237	732	0.137314	0
33	2.25	41.7	140	5473	226	734	0.488732	14.8766
34	2.25	41.7	140	5473	226	734	0.488728	14.8771
35	2.48333	41.7333	148	5437	225	780	0.311357	0
36	2.48333	41.7333	148	5437	225	780	0.311344	0
37	2.85	42.4	149	5482	240	647	0.251733	3.24328
38	2.85	42.4	149	5482	240	647	0.25173	3.24328
39	2.91667	41.7833	148	5310	222	738	0.204643	8.97377
40	2.91667	41.7833	148	5310	222	738	0.204648	8.97342
41	2.51667	41.7667	141	5449	226	824	0.411881	2.33815
42	2.51667	41.7667	141	5449	226	824	0.411875	2.33825
43	2.48333	41.7667	107	5398	222	915	0.75951	0
44	2.48333	41.7667	107	5398	222	915	0.759515	0
45	1.2	41.3333	134	5644	240	634	0.386541	0
46	1.2	41.3333	134	5644	240	634	0.386535	0
47	1.0508	42.5985	24	5371	225	1357	0.233774	0
48	1.0508	42.5985	24	5371	225	1357	0.233782	0
49	1.0508	42.5985	24	5371	225	1357	0.23379	0
50	-3.58591	40.0187	143	6766	311	420	0.098933	26.6637
51	-3.50569	40.2624	138	6725	305	442	0.422272	3.69134
52	-3.99916	41.0249	105	6350	282	502	0.461303	0
53	-4.07066	41.0332	110	6395	282	489	0.31326	0
54	-3.98172	39.8359	144	6874	317	406	0.192775	4.17578
55	-2.36667	37.1167	150	5720	267	369	0.905761	0.0178181
56	3.05	42.3667	153	5355	235	607	0.289238	0
57	3.05001	42.3667	153	5355	235	607	0.28928	0
58	3.05002	42.3667	153	5355	235	607	0.289322	0
59	3.05003	42.3667	153	5355	235	607	0.289363	0
60	3.05004	42.3667	153	5355	235	607	0.289405	0
61	1.93189	41.3493	141	5340	220	700	0.34528	10.5594
63	1.89319	41.3336	149	5315	219	666	0.21613	13.9759
64	1.95785	41.2877	160	5197	214	633	0.164913	33.519
65	1.9599	41.289	162	5136	214	622	0.166492	33.0442
67	1.86122	41.2654	158	5158	213	629	0.632925	9.73418
68	1.829	41.266	157	5182	215	631	0.229779	4.26054
69	1.8718	41.2755	150	5266	217	668	0.867385	1.28505
70	1.83675	41.316	148	5300	219	666	0.450261	0
71	1.84738	41.2395	160	5121.5	213	621	0.202842	13.6025
72	1.85441	41.2401	162	5117	212.67	614	0.217459	12.2605
73	1.89534	41.256	162	5109	213	621	0.219705	19.3276
74	1.90624	41.2644	160	5152	214	626	0.306845	26.7383
75	1.90918	41.2608	159	5157	213	630	0.250327	27.8266
76	1.76332	41.296	159	5219	217	611	0.222479	25.3371
77	1.84895	41.2826	158	5190	215	625	0.812671	0
80	-3.06594	38.0691	160	6552	308	412	0.715576	0
81	-3.06594	38.0691	160	6552	308	412	0.715595	0
82	-3.06594	38.0691	160	6552	308	412	0.715613	0
83	-3.06594	38.0691	160	6552	308	412	0.715632	0
84	-3.06594	38.0691	160	6552	308	412	0.71565	0
85	-3.06595	38.0691	160	6552	308	412	0.715669	0
86	-3.44305	40.2373	137	6723	306	441	0.175691	36.9494
87	-3.44305	40.2373	137	6723	306	441	0.175694	36.9498
88	-3.44305	40.2373	137	6723	306	441	0.175697	36.9503
89	-3.44305	40.2373	137	6723	306	441	0.1757	36.9507
90	-3.43808	40.301	138	6700	304	440	0.0961765	34.9018
91	-3.43808	40.301	138	6700	304	440	0.0961774	34.9031
92	2.08773	41.4304	158	5315	220	624	0.141361	31.0713
93	2.12899	41.435	149	5320	220	674	0.314125	26.9821
94	2.11822	41.4252	148	5302	219	681	0.309632	36.9387
95	2.12381	41.428	148	5302	219	681	0.303902	33.0426
96	2.10332	41.4179	153	5311	220	656	0.166673	34.056
97	2.11329	41.419	148	5320	220	677	0.208422	44.7531
100	2.123	41.4163	156	5290	219	639	0.225245	57.2494
103	2.08595	41.4163	151	5304	220	666	0.14361	21.1753
104	2.08888	41.4168	150	5324	220	667	0.137267	25.2283
105	2.03589	41.4496	158	5318	220	615	0.424267	35.0287
106	2.0725	41.4365	160	5279	220	613	0.286273	33.9773
107	-6.51477	37.0111	178	5038	232	525	0.349569	0
108	-6.39497	36.9975	179	5143	236	532	0.999776	0
109	-6.53739	37.0069	178	4979	230	522	0.185004	24.9385
110	-6.4323	37.0222	179	5129	236	530	0.41838	0
111	-6.41875	36.9506	179	5029	232	532	0.593765	0
112	-6.46066	36.9373	179	4973.5	228.5	528.5	0.25609	0
113	-6.4922	37.0217	178	5060	232	525	0.433263	0
114	-6.47908	37.097	179	5194	239	520	0.347936	0
115	-4.14615	36.9866	143	6038	292	579	0.380228	2.3852
116	-4.15999	37.1577	142	6256	301	598	0.357459	9.21419
117	-4.13218	37.0255	124	6268	306	684	0.848046	0
118	-4.03344	36.9606	137	6135	300	588	0.365623	0
119	-4.16216	37.1244	120	6352	310	716	1	0
120	-6.3939	37.1746	180	5404	251	529	0.586978	0
121	-6.32242	37.1854	180	5481	257	541	0.219654	0
122	-6.37519	37.3126	177	5638	265	545	0.357487	0.0663775
124	-6.38382	37.3368	178	5653	266	543	0.354315	0
125	-6.34269	37.2807	180	5604	264	539	0.483229	0
126	-6.35046	37.1782	180	5454	254	535	0.393701	0
127	-6.35467	37.3674	179	5705	271	544	0.599722	0.306735
128	-6.42092	37.621	164	5928	283	604	0.340805	0
129	-6.42092	37.621	164	5928	283	604	0.340805	0
130	-3.69729	37.3706	147	6586	317	524	0.134486	0
131	-3.69729	37.3706	147	6586	317	524	0.134485	0
132	-3.69729	37.3706	147	6586	317	524	0.134484	0
133	-3.51803	37.1533	144	6446	315	499	0.125194	1.91367
136	4.87557	43.5256	140	5965	271	621	0.546398	0
137	4.81283	43.5398	141	5944	271	627	0.38057	0
138	4.91577	43.5836	138	5956	271	623	0.392879	2.27437
139	4.97771	43.6573	136	5997	273	626	0.188581	0.764481
142	3.04472	42.587	156	5473.86	244.29	575.86	0.29688	12.0241
145	3.03778	42.7086	155	5567	249	579.5	0.258548	25.0926
146	3.03762	42.7762	155	5582.5	252	584	0.27573	22.2131
147	3.05401	42.9192	150	5565	253	609	0.338659	5.38983
148	3.05391	43.0047	151	5613	256	610	0.213075	21.6861
150	3.05013	43.1033	150	5652	259	619	0.132783	0
151	3.13645	43.1278	149	5675.33	259.33	628.33	0.195954	7.21313
152	3.1571	43.1488	147.8	5653.8	259.2	633.8	0.237207	11.986
162	-0.1641	41.7919	135	5961	279	410	0.23371	7.06862
163	-0.17744	41.8049	136	5972	279	406	0.316533	3.55699
164	-0.18875	41.7992	136	5977	279	406	0.192045	0.0190379
165	-0.2641	41.7811	134	5896	277	403	0.30607	0
166	-0.26411	41.7811	134	5896	277	403	0.305937	0
167	3.03144	42.4989	120	5417	235	811	0.566001	0
168	3.1412	42.4565	139	5339	235	680	0.167633	3.60564
169	3.15337	42.4623	155	5337	239	585	0.252989	3.95651
170	3.10123	42.4789	150	5385	239	611	0.218358	4.99106
171	3.07218	42.4917	133	5402	237	726	0.349452	0
172	3.03283	42.4803	115	5393	232	839	0.382795	0
173	3.03283	42.4803	115	5393	232	839	0.382795	0
174	3.01877	42.4766	114	5378	232	844	0.441098	0
175	3.04309	42.4798	116	5379	232	828	0.320046	0
176	3.0774	42.4862	139	5387	237	686	0.343335	0
177	3.14925	42.4535	150	5360	237	611	0.171488	7.62699
178	3.13768	42.4605	144	5360	236	650	0.182407	5.06974
179	3.1459	42.4659	150	5334	237	611	0.203496	8.8631
180	-7.11667	42.65	110	5132	245	949	0.313054	0
182	-2.86667	37.9333	105	6683	322	647	1	0
183	-2.86667	37.9333	105	6683	322	647	1	0
184	-2.53333	38.2667	109	6632	319	590	0.867257	0
185	-3.46667	37.7333	86	6805	328	810	0.259322	0
186	-3.5	37.7167	117	6805	326	661	0.168624	0
187	-3.46667	37.1667	126	6514	316	588	0.322752	0
188	-2.85	37.4	105	6538	316	655	0.296247	0
189	-4.38578	37.493	139	6561	313	683	0.265276	0.25277
190	-5.40111	36.7514	133	5643	274	868	0.0914765	0
191	-4.7846	38.1499	156	6863	329	631	0.568392	0
192	3.1564	42.4322	156	5307	237	576	0.248194	9.61785
193	3.15308	42.4319	156	5307	237	576	0.264281	9.50932
194	3.1488	42.4299	148	5329	236	619	0.323095	7.77249
195	2.57732	41.6023	154	5360	221	727	0.0736897	15.1393
196	2.57341	41.6006	153	5355	222	739	0.0780989	15.7986
197	2.57633	41.6103	150	5332	222	758	0.0851423	7.67441
198	2.1106	41.6334	144	5466	225	676	0.536572	3.95573
199	2.09681	41.6303	135	5439	225	713	0.437093	13.6035
200	2.11639	41.6307	147	5431	226	666	0.443964	3.95573
201	2.09461	41.5063	159	5319	220	598	0.0910469	45.3649
202	2.08569	41.4373	154	5319	220	648	0.159901	37.2544
203	-3.68333	37.6667	113	6796	327	699	0.182923	0
204	-6.55	37.0167	178	4987	230	522	0.286425	15.3823
205	-0.56972	42.5993	78	5386	248	904	0.121024	0
206	-0.569721	42.5993	78	5386	248	904	0.121023	0
207	-0.569722	42.5993	78	5386	248	904	0.121022	0
208	-0.569723	42.5993	78	5386	248	904	0.121021	0
209	-6.53065	37.0177	178	5040	233	524	0.305513	0
210	-6.5321	37.017	178	5040	233	524	0.308868	0.998006
211	-6.47075	36.9955	179	5081	233	525	0.978886	0
212	-6.44816	37.0209	179	5099	236	527	0.495476	0
213	-6.45215	36.9935	179	5033	232	527	0.685433	0
214	-6.45173	36.9929	179	5033	232	527	0.676846	0
215	-6.45488	37.0022	179	5077	234	527	0.724713	0
216	-6.44692	37.0181	179	5099	236	527	0.470304	0
217	-6.45046	36.9986	179	5033	232	527	0.603109	0
218	-6.47135	36.9897	179	5031	231	525	0.886079	0
219	-6.49357	36.9771	179	4978	231	525	0.255155	0
220	-6.49506	36.9765	179	4978	231	525	0.246929	0
221	1.86667	41.5833	152	5437	226	610	0.393095	0.0288199
222	1.63333	41.8667	127	5671	240	706	0.29734	0
223	1.67941	41.8396	133	5699	240	667	0.592532	0
224	1.8641	41.9635	135	5669	238	668	0.287654	5.85564
225	1.65771	41.7194	132	5606	236	674	0.159311	0
226	1.67234	41.9455	131	5676	242	683	0.482797	0
227	16.5167	48.1667	100	7282	300	621	0.182892	21.5385
228	16.7	48.1167	99	7342	300	627	0.215885	8.85287
229	16.5167	48.15	100	7305	301	623	0.113741	35.5525
230	16.5167	48.15	100	7305	301	623	0.113741	35.5524
231	16.5167	48.15	100	7305	301	623	0.113741	35.5523
232	2.45	51.040000‎	104	4932	197	672	0.351673	18.9438
233	5.8044	50.7557	92	5560	223	911	0.0891511	10.723
234	5.85491	50.7459	91	5552	222	949	0.0848454	15.318
235	5.81124	50.7322	91	5538	222	927	0.0704359	13.8712
236	5.81232	50.7548	93	5550	223	895	0.0903893	11.2307
237	5.81113	50.7262	91	5538	222	927	0.0629664	12.2004
238	5.80947	50.727	91	5538	222	927	0.065441	12.3852
239	5.80404	50.7572	92	5560	223	911	0.0893843	10.4783
241	5.79717	50.7588	95	5531	223	864	0.08204	10.3328
242	5.79476	50.7589	95	5531	223	864	0.0792528	9.8769
243	5.8135	50.7271	91	5538	222	927	0.0633455	12.428
244	5.81393	50.7237	91	5531	222	946	0.0608583	12.6078
245	5.81247	50.7306	91	5538	222	927	0.067943	12.8808
246	5.81394	50.7305	91	5538	222	927	0.067717	13.0605
247	5.81495	50.7271	91	5538	222	927	0.0630381	12.6575
248	5.453056‎	50.5944	99	5601	229	820	0.138647	57.89
249	5.451111‎	50.5947	99	5601	229	820	0.137015	56.6553
250	5.445278‎	50.5933	93	5605	227	884	0.126409	56.0839
251	5.445278‎	50.5928	93	5605	227	884	0.125174	55.9656
252	5.428611‎	50.5778	94	5587	227	869	0.083886	37.7641
253	5.408333‎	50.5767	98	5597	228	820	0.0792615	43.2518
254	5.408889‎	50.5767	98	5600	228	827	0.0792012	43.0652
255	5.831111‎	50.5397	90	5597	223	983	0.165745	23.5172
256	5.830833‎	50.5397	90	5597	223	983	0.165308	23.5477
257	5.830000‎	50.54	90	5597	223	983	0.163883	23.6536
258	5.830000‎	50.5394	90	5597	223	983	0.162706	23.695
259	5.820833‎	50.5408	92	5598	223	952	0.133096	25.2397
260	24	62	31	8588	339	590	0.374489	0.907958
261	24	62	31	8588	339	590	0.374411	0.909912
262	24	62	31	8588	339	590	0.374332	0.911857
263	24	62	31	8588	339	590	0.374253	0.913794
264	24	62	31	8588	339	590	0.374175	0.915732
265	24.0001	62	31	8588	339	590	0.374096	0.917669
266	23.5	61.9167	28	8601	338	603	0.369596	0
267	23.5	61.9167	28	8601	338	603	0.369591	0
268	23.5	61.9167	28	8601	338	603	0.369586	0
269	23.5	61.9167	28	8601	338	603	0.369581	0
271	6.21383	53.4904	87	5337	212	804	0.45767	0
272	6.17719	53.4909	86	5361	212	806	0.27491	2.18313
273	4.81526	53.092	89	5299	196	772	0.328994	0
274	4.95997	53.2576	89	5251	196	779	0.201304	0
276	5.34671	53.4116	87	5261	201	798	0.169765	0
277	5.72016	53.4502	87	5284	206	804	0.240701	3.60859
278	6.22124	53.4902	87	5348	212	803	0.42411	0
279	6.49433	53.5389	87	5450.33	213	803.33	0.430867	0
281	6.69662	53.5971	87	5508	211	806	0.111699	15.6277
283	6.88725	53.636	88	5609	210	801	0.365041	0
284	6.95087	53.6726	88	5628.67	208	801.33	0.192051	0.168925
285	7.20183	53.7149	89	5704	204	799	0.206748	1.1878
286	7.39041	53.7311	89	5622	203	798	0.219762	7.05394
287	7.50973	53.7496	89	5588	205	796	0.13986	6.14627
288	7.73466	53.7691	88	5547	204	793	0.198502	0
289	7.92099	53.7869	88	5549	207	790	0.251603	8.17514
291	9.03741	50.4904	90	6443	261	694	0.201097	0
292	8.48258	50.7538	83	6182	246	821	0.0720705	19.3335
293	8.48258	50.7538	83	6182	246	821	0.0720704	19.3335
294	8.48258	50.7538	83	6182	246	821	0.0720704	19.3335
295	8.48258	50.7538	83	6182	246	821	0.0720705	19.3335
296	25.616667‎	46.6667	45	7102	291	789	0.380031	4.82664
297	25.616667‎1	46.6667	45	7102	291	789	0.380031	4.82673
300	25.516667‎01	46.4833	77	7780	325	617	0.214728	0
301	25.516667‎02	46.4833	77	7780	325	617	0.214728	0
302	25.516667‎03	46.4833	77	7780	325	617	0.214729	0
303	26.350000‎	46.1833	48	7557	301	730	0.449939	0
304	26.350000‎01	46.1833	48	7557	301	730	0.449939	0
305	26.283333‎	46.1833	50	7582	301	722	0.134369	0
309	22.738056‎	46.4767	71	7085	287	775	0.308548	0
311	22.838611‎	46.4567	75	7117	289	745	0.140806	7.63179
312	22.860000‎	46.4531	75	7159	290	739	0.210824	4.83443
313	22.954167‎	46.4506	80	7254	295	704	0.104487	6.86213
314	23.0175	46.3714	86	7404	301	669	0.0960684	7.54919
316	22.901111‎	46.3725	83	7304	298	695	0.133634	7.97687
317	22.950833‎	46.3714	83	7313	298	692	0.119085	7.67532
318	22.987778‎	46.3664	82	7274	296	696	0.137384	7.51302
320	24.711667‎	47.6355	65	7593	311	750	0.122557	13.5657
321	24.692222‎	47.6185	60	7507	307	768	0.126443	3.05648
322	24.686000‎	47.6094	45	7154	291	836	0.178731	0.596488
323	24.688611‎	47.6019	46	7166	292	831	0.304607	0
325	-2.08265	50.6669	101	4417	198	795	0.367868	3.02292
326	-5.33316	51.8543	97	4233	170	887	0.668717	0
327	24	62	31	8588	339	590	0.374481	0.908158
328	24	62	31	8588	339	590	0.374474	0.908349
329	24	62	31	8588	339	590	0.374466	0.908548
330	22.3172	47.7191	101	7861	319	626	0.405542	0
331	22.3184	47.7188	101	7861	319	626	0.396983	0
332	22.3182	47.718	101	7861	319	626	0.380966	0
333	11.3148	51.8445	87	6406	253	528	0.926402	2.48201
334	11.3148	51.8445	87	6406	253	528	0.926402	2.482
335	11.3148	51.8445	87	6406	253	528	0.926402	2.48199
336	11.3148	51.8445	87	6406	253	528	0.926402	2.48198
337	11.7629	51.2143	90	6389	255	509	0.196321	14.6031
338	11.7326	51.2107	85	6339	254	548	0.286401	3.63551
339	11.7606	51.2174	87	6366	255	527	0.206383	12.6265
340	11.0494	51.3129	87	6413	257	515	0.324308	4.58432
341	11.0494	51.3129	87	6413	257	515	0.324308	4.58431
342	10.9014	51.829	85	6313	250	588	0.318024	3.70268
343	11.2081	51.8382	88	6351	251	528	0.716704	13.4123
344	11.2061	51.8369	88	6351	251	528	0.708477	13.1699
345	13.5514	51.1955	87	6752	262	618	0.729733	5.21167
346	11.163	51.78	88	6346	251	530	0.403182	39.7641
347	11.163	51.78	88	6346	251	530	0.403182	39.7641
348	11.163	51.78	88	6346	251	530	0.403182	39.7641
349	14.8883	51.4122	86	6959	271	607	0.2046	0
350	14.3994	51.3734	89	6935	269	582	0.186649	6.04889
353	12.4312	50.768	78	6616	259	606	0.31282	20.4817
356	11.3985	51.886	87	6438	253	526	0.820811	6.94281
358	14.8817	51.4105	86	6957	270	607	0.196103	0
359	14.8817	51.4105	86	6957	270	607	0.196103	0
360	11.2603	51.6869	77	6295	248	629	0.20073	0
361	11.2603	51.6869	77	6295	248	629	0.20073	0
362	11.2554	51.6836	79	6324	249	609	0.180795	0
363	11.2554	51.6836	79	6324	249	609	0.180795	0
365	14.5903	51.013	74	6801	262	622	0.198916	30.9011
367	14.4133	51.0376	76	6822	262	613	0.185291	9.80558
368	14.9319	51.1294	79	6831	267	641	0.320364	26.8552
371	14.5997	51.4679	88	6966	271	589	0.550735	71.5681
372	14.1765	51.3951	89	6906	267	585	0.394616	1.745
373	13.05	42.3333	84	6192	248	817	0.515761	0
374	3	44.0167	120	5907	273	732	0.419591	0
375	2.083333‎	44.0167	123	5724	263	772	0.424849	0
376	3	44.0167	120	5907	273	732	0.419591	0
378	19.326389‎	46.3756	108	7709	308	567	0.128461	0
379	19.326389‎01	46.3756	108	7709	308	567	0.128461	0
380	19.326389‎02	46.3756	108	7709	308	567	0.128461	0
381	19.326389‎03	46.3756	108	7709	308	567	0.128461	0
382	19.326389‎04	46.3756	108	7709	308	567	0.128461	0
383	19.326389‎05	46.3756	108	7709	308	567	0.128461	0
384	19.326389‎06	46.3756	108	7709	308	567	0.128461	0
385	23.2542	59.8448	54	7907	300	602	0.729054	0
386	23.2542	59.8448	54	7918	300	602	0.729055	0
387	23.2542	59.8448	54	7918	300	602	0.729056	0
388	23.2542	59.8448	54	7918	300	602	0.729057	0
389	23.2456	59.8382	54	7907	300	602	0.727571	0
390	23.2452	59.8416	54	7918	300	602	0.669141	0
391	23.2418	59.8296	54	7918	300	602	0.777545	0
392	23.2803	59.8483	54	7918	300	602	0.877625	0
393	23.2578	59.8424	54	7918	300	602	0.802474	0
394	23.2445	59.8319	54	7918	300	602	0.757697	0
395	23.247	59.8215	54	7907	300	602	0.932442	0
396	17.1161	59.5001	61	7388	283	557	0.180301	0
397	17.1161	59.5001	61	7388	283	557	0.180302	0
398	17.1161	59.5001	61	7388	283	557	0.180302	0
399	17.1161	59.5001	61	7388	283	557	0.180302	0
400	17.1161	59.5001	61	7388	283	557	0.180302	0

## Sheet: legend
MAT	Mean annual temperature
TS	Temperature seasonality
TAR	Temperature annual range
AP	Annual precipitation
PS	Precipitation seasonality
Idiv	Land-use diversity index
Idist	Anthropogenic disturbance index
